# Supplementary material for: Technical efficiency of national HIV/AIDS spending in 78 countries between 2010 and 2018: A data envelopment analysis
Source: PLOS Glob Public Health. 2022 Aug 1;2(8):e0000463. doi: 10.1371/journal.pgph.0000463 (PMC10022340; doi:10.1371/journal.pgph.0000463)
Supplement: S2 Data — (XLSX) [file pgph.0000463.s003.xlsx]

## Sheet: Sheet1
wkt_geom	featurecla	scalerank	LABELRANK	SOVEREIGNT	SOV_A3	ADM0_DIF	LEVEL	TYPE	ADMIN	ADM0_A3	GEOU_DIF	GEOUNIT	GU_A3	SU_DIF	SUBUNIT	SU_A3	BRK_DIFF	NAME	NAME_LONG	BRK_A3	BRK_NAME	BRK_GROUP	ABBREV	POSTAL	FORMAL_EN	FORMAL_FR	NAME_CIAWF	NOTE_ADM0	NOTE_BRK	NAME_SORT	NAME_ALT	MAPCOLOR7	MAPCOLOR8	MAPCOLOR9	MAPCOLOR13	POP_EST	POP_RANK	GDP_MD_EST	POP_YEAR	LASTCENSUS	GDP_YEAR	ECONOMY	INCOME_GRP	WIKIPEDIA	FIPS_10_	ISO_A2	ISO_A3	ISO_A3_EH	ISO_N3
MultiPolygon (((180 -16.06713266364244674, 180 -16.55521656663919572, 179.36414266196413791 -16.80135407694688254, 178.72505936299711493 -17.01204167436803871, 178.59683859511713422 -16.63915000000000433, 179.09660936299709988 -16.43398427754740254, 179.41350936299710384 -16.37905427754740373, 180 -16.06713266364244674)),((178.1255700000000104 -17.50480999999999909, 178.37360000000001037 -17.3399…	Admin-0 country	1	6	Fiji	FJI	0	2	Sovereign country	Fiji	FJI	0	Fiji	FJI	0	Fiji	FJI	0	Fiji	Fiji	FJI	Fiji		Fiji	FJ	Republic of Fiji		Fiji			Fiji		5	1	2	2	920938	11	8374	2017	2007	2016	6. Developing region	4. Lower middle income	-99	FJ	FJ	FJI	FJI	242
MultiPolygon (((33.90371119710452774 -0.95000000000000007, 34.07261999999997215 -1.05981999999994514, 37.6986899999999423 -3.0969899999999484, 37.76689999999999969 -3.67712000000000039, 39.20221999999999696 -4.67677000000000032, 38.74053999999995312 -5.90894999999994752, 38.79977000000008047 -6.47566000000000486, 39.43999999999999773 -6.8399999999998613, 39.47000000000014097 -7.09999999999996589,…	Admin-0 country	1	3	United Republic of Tanzania	TZA	0	2	Sovereign country	United Republic of Tanzania	TZA	0	Tanzania	TZA	0	Tanzania	TZA	0	Tanzania	Tanzania	TZA	Tanzania		Tanz.	TZ	United Republic of Tanzania		Tanzania			Tanzania		3	6	2	2	53950935	16	150600	2017	2002	2016	7. Least developed region	5. Low income	-99	TZ	TZ	TZA	TZA	834
MultiPolygon (((-8.66558956545480896 27.65642588959235582, -8.66512447756419135 27.58947907155822676, -8.68439978680905256 27.39574412689600535, -8.68729366701739991 25.88105621998890626, -11.96941891117116086 25.93335276946826795, -11.93722449385332141 23.37459422453616753, -12.87422156416957542 23.28483226164517816, -13.11875444177471195 22.77122020109625566, -12.92910193526353169 21.3270706242…	Admin-0 country	1	7	Western Sahara	SAH	0	2	Indeterminate	Western Sahara	SAH	0	Western Sahara	SAH	0	Western Sahara	SAH	1	W. Sahara	Western Sahara	B28	W. Sahara		W. Sah.	WS	Sahrawi Arab Democratic Republic		Western Sahara	Self admin.	Self admin.; Claimed by Morocco	Western Sahara		4	7	4	4	603253	11	906.5	2017	-99	2007	7. Least developed region	5. Low income	-99	WI	EH	ESH	ESH	732
MultiPolygon (((-122.84000000000003183 49.00000000000011369, -122.97421000000001357 49.00253777777778197, -124.91024000000000171 49.98456000000000188, -125.62461000000000411 50.41656000000000404, -127.43561000000001115 50.83061000000000007, -127.99276000000000408 51.71582999999999686, -127.85031999999999641 52.3296100000000024, -129.12979000000001406 52.75538000000000238, -129.30522999999999456 5…	Admin-0 country	1	2	Canada	CAN	0	2	Sovereign country	Canada	CAN	0	Canada	CAN	0	Canada	CAN	0	Canada	Canada	CAN	Canada		Can.	CA	Canada		Canada			Canada		6	6	2	2	35623680	15	1674000	2017	2011	2016	1. Developed region: G7	1. High income: OECD	-99	CA	CA	CAN	CAN	124
MultiPolygon (((-122.84000000000003183 49.00000000000011369, -120 49.00000000000011369, -117.03121000000000151 49, -116.04818000000000211 49, -113 49, -110.05000000000001137 49, -107.05000000000001137 49, -104.0482600000000275 48.99986000000006925, -100.65000000000003411 49.00000000000011369, -97.22872000000479886 49.00070000000000192, -95.1590695091720562 49, -95.15609000000000606 49.38425000000…	Admin-0 country	1	2	United States of America	US1	1	2	Country	United States of America	USA	0	United States of America	USA	0	United States	USA	0	United States of America	United States	USA	United States		U.S.A.	US	United States of America		United States			United States of America		4	5	1	1	326625791	17	18560000	2017	2010	2016	1. Developed region: G7	1. High income: OECD	0	US	US	USA	USA	840
MultiPolygon (((87.35997033076264984 49.21498078062911929, 86.5987764831033644 48.54918162698062645, 85.76823286330829887 48.45575063739698862, 85.720483839870667 47.45296946877310518, 85.16429039911324139 47.00095571551609908, 83.18048383986047156 47.3300312363508624, 82.45892581576906366 45.53964956316650614, 81.94707075391809781 45.31702749285312137, 79.96610639844141133 44.91751699480462889, …	Admin-0 country	1	3	Kazakhstan	KAZ	0	2	Sovereign country	Kazakhstan	KAZ	0	Kazakhstan	KAZ	0	Kazakhstan	KAZ	0	Kazakhstan	Kazakhstan	KAZ	Kazakhstan		Kaz.	KZ	Republic of Kazakhstan		Kazakhstan			Kazakhstan		6	1	6	1	18556698	14	460700	2017	2009	2016	6. Developing region	3. Upper middle income	-99	KZ	KZ	KAZ	KAZ	398
MultiPolygon (((55.96819135928291189 41.30864166926936321, 55.92891727074109554 44.99585846615911322, 58.50312706892844972 45.58680430763297409, 58.68998904809581063 45.50001373959872808, 60.23997195825833728 44.7840367701947315, 61.05831994003244745 44.40581696225051189, 62.01330040878625027 43.50447663021564892, 63.1857869810565731 43.65007497819800619, 64.90082441595927776 43.72808055274258265…	Admin-0 country	1	3	Uzbekistan	UZB	0	2	Sovereign country	Uzbekistan	UZB	0	Uzbekistan	UZB	0	Uzbekistan	UZB	0	Uzbekistan	Uzbekistan	UZB	Uzbekistan		Uzb.	UZ	Republic of Uzbekistan		Uzbekistan			Uzbekistan		2	3	5	4	29748859	15	202300	2017	1989	2016	6. Developing region	4. Lower middle income	-99	UZ	UZ	UZB	UZB	860
MultiPolygon (((141.00021040259184701 -2.60015105551565995, 142.7352466167914713 -3.28915292726320985, 144.58397098203323594 -3.86141773846341607, 145.27317955950996975 -4.37373788820504927, 145.82978641172570633 -4.8764978979726834, 145.98192182839301267 -5.46560922610004329, 147.64807335834757396 -6.08365935631084653, 147.89110761941623196 -6.61401458092234318, 146.97090538959486139 -6.72165658…	Admin-0 country	1	2	Papua New Guinea	PNG	0	2	Sovereign country	Papua New Guinea	PNG	0	Papua New Guinea	PNG	1	Papua New Guinea	PN1	0	Papua New Guinea	Papua New Guinea	PN1	Papua New Guinea		P.N.G.	PG	Independent State of Papua New Guinea		Papua New Guinea			Papua New Guinea		4	2	3	1	6909701	13	28020	2017	2000	2016	6. Developing region	4. Lower middle income	-99	PP	PG	PNG	PNG	598
MultiPolygon (((141.00021040259184701 -2.60015105551565995, 141.01705691951895005 -5.85902190513807142, 141.03385176001381751 -9.11789275476048289, 140.14341515519254244 -8.29716765710094961, 139.12776655492808686 -8.09604298262097899, 138.88147667862500612 -8.38093515384607457, 137.61447391169286902 -8.41168263105974034, 138.03909915583517432 -7.59788217532732091, 138.66862145401478301 -7.320224…	Admin-0 country	1	2	Indonesia	IDN	0	2	Sovereign country	Indonesia	IDN	0	Indonesia	IDN	0	Indonesia	IDN	0	Indonesia	Indonesia	IDN	Indonesia		Indo.	INDO	Republic of Indonesia		Indonesia			Indonesia		6	6	6	11	260580739	17	3028000	2017	2010	2016	4. Emerging region: MIKT	4. Lower middle income	-99	ID	ID	IDN	IDN	360
MultiPolygon (((-68.63401022758323222 -52.63637045887448807, -68.25 -53.10000000000000142, -67.75 -53.85000000000000142, -66.45000000000000284 -54.45000000000000284, -65.04999999999999716 -54.69999999999999574, -65.5 -55.20000000000000284, -66.45000000000000284 -55.25, -66.95992000000001099 -54.89681000000001632, -67.56243999999999517 -54.87001000000000062, -68.63335000000000719 -54.8694999999999…	Admin-0 country	1	2	Argentina	ARG	0	2	Sovereign country	Argentina	ARG	0	Argentina	ARG	0	Argentina	ARG	0	Argentina	Argentina	ARG	Argentina		Arg.	AR	Argentine Republic		Argentina			Argentina		3	1	3	13	44293293	15	879400	2017	2010	2016	5. Emerging region: G20	3. Upper middle income	-99	AR	AR	ARG	ARG	32
MultiPolygon (((-68.63401022758323222 -52.63637045887448807, -68.63335000000000719 -54.86949999999999505, -67.56243999999999517 -54.87001000000000062, -66.95992000000001099 -54.89681000000001632, -67.29102999999992107 -55.30123999999995021, -68.14862999999991189 -55.61182999999999765, -68.6399908108118666 -55.58001799908691964, -69.23210000000000264 -55.499059999999929, -69.95808999999997013 -55.…	Admin-0 country	1	2	Chile	CHL	0	2	Sovereign country	Chile	CHL	0	Chile	CHL	0	Chile	CHL	0	Chile	Chile	CHL	Chile		Chile	CL	Republic of Chile		Chile			Chile		5	1	5	9	17789267	14	436100	2017	2002	2016	5. Emerging region: G20	3. Upper middle income	-99	CI	CL	CHL	CHL	152
MultiPolygon (((29.33999759290034604 -4.49998341229409249, 29.51998660657292817 -5.41997893638631467, 29.41999271008816663 -5.93999887453943387, 29.6200321794900141 -6.52001515058342562, 30.19999677910169567 -7.0799809708981627, 30.74001549655179133 -8.34000741947091484, 30.74000973142209503 -8.34000593035372084, 30.34608605319081676 -8.23825652428821797, 29.00291222506047006 -8.40703175215347187…	Admin-0 country	1	2	Democratic Republic of the Congo	COD	0	2	Sovereign country	Democratic Republic of the Congo	COD	0	Democratic Republic of the Congo	COD	0	Democratic Republic of the Congo	COD	0	Dem. Rep. Congo	Democratic Republic of the Congo	COD	Democratic Republic of the Congo		D.R.C.	DRC	Democratic Republic of the Congo		Congo, Democratic Republic of the			Congo, Dem. Rep.		4	4	4	7	83301151	16	66010	2017	1984	2016	7. Least developed region	5. Low income	-99	CG	CD	COD	COD	180
MultiPolygon (((41.58512999999999948 -1.68325000000000014, 40.9930000000000021 -0.85829, 40.98105000000000331 2.78451999999999966, 41.85508309264397298 3.91891192048372705, 42.12860999999999478 4.23413000000000039, 42.76966999999999786 4.25258999999999965, 43.66086999999998852 4.95755000000008295, 44.96360000000000667 5.00161999999999995, 47.78941999999999979 8.00300000000000011, 48.4867358742269…	Admin-0 country	1	6	Somalia	SOM	0	2	Sovereign country	Somalia	SOM	0	Somalia	SOM	0	Somalia	SOM	0	Somalia	Somalia	SOM	Somalia		Som.	SO	Federal Republic of Somalia		Somalia			Somalia		2	8	6	7	7531386	13	4719	2017	1987	2016	7. Least developed region	5. Low income	-99	SO	SO	SOM	SOM	706
MultiPolygon (((39.20221999999999696 -4.67677000000000032, 37.76689999999999969 -3.67712000000000039, 37.6986899999999423 -3.0969899999999484, 34.07261999999997215 -1.05981999999994514, 33.90371119710452774 -0.95000000000000007, 33.89356896966694421 0.10981353786189629, 34.17999999999999972 0.51500000000000001, 34.67210000000000036 1.17693999999999988, 35.03598999999999819 1.90583999999999998, 34…	Admin-0 country	1	2	Kenya	KEN	0	2	Sovereign country	Kenya	KEN	0	Kenya	KEN	0	Kenya	KEN	0	Kenya	Kenya	KEN	Kenya		Ken.	KE	Republic of Kenya		Kenya			Kenya		5	2	7	3	47615739	15	152700	2017	2009	2016	5. Emerging region: G20	5. Low income	-99	KE	KE	KEN	KEN	404
MultiPolygon (((24.56736901215208491 8.22918793378546809, 23.8058134294667525 8.66631887454252592, 23.45901289235598597 8.95428579348889286, 23.39477908701718434 9.26506785729222315, 23.55724979014282994 9.6812181665386845, 23.55430423350219371 10.08925527591530802, 22.9775435726926105 10.71446259199854012, 22.86416548024422468 11.14239512780754637, 22.8762199999999325 11.38461000000012291, 22.50…	Admin-0 country	1	3	Sudan	SDN	0	2	Sovereign country	Sudan	SDN	0	Sudan	SDN	0	Sudan	SDN	0	Sudan	Sudan	SDN	Sudan		Sudan	SD	Republic of the Sudan		Sudan			Sudan		2	6	4	1	37345935	15	176300	2017	2008	2016	6. Developing region	4. Lower middle income	-99	SU	SD	SDN	SDN	729
MultiPolygon (((23.83766000000014174 19.58047000000010485, 23.88689000000010765 15.61083999999999605, 23.02459000000010292 15.68072000000006483, 22.56795000000010987 14.9442900000001373, 22.3035099999999602 14.32682000000005473, 22.5120200000000068 14.09317999999996118, 22.18328999999999951 13.78648000000004004, 22.29658000000000584 13.37231999999994514, 22.03758999999996604 12.95545999999995956,…	Admin-0 country	1	3	Chad	TCD	0	2	Sovereign country	Chad	TCD	0	Chad	TCD	0	Chad	TCD	0	Chad	Chad	TCD	Chad		Chad	TD	Republic of Chad		Chad			Chad		6	1	8	6	12075985	14	30590	2017	2009	2016	7. Least developed region	5. Low income	-99	CD	TD	TCD	TCD	148
MultiPolygon (((-71.71236141629296412 19.71445587816735667, -71.62487321642282723 19.16983795824330628, -71.70130265978249895 18.78541697842405256, -71.94511206733555753 18.61690013272026079, -71.68773759630587961 18.31666006110447142, -71.70830481635805143 18.04499705654609443, -72.37247616238934711 18.21496084235405988, -72.84441118029488393 18.14561107021836506, -73.45455481636503237 18.217906…	Admin-0 country	1	5	Haiti	HTI	0	2	Sovereign country	Haiti	HTI	0	Haiti	HTI	0	Haiti	HTI	0	Haiti	Haiti	HTI	Haiti		Haiti	HT	Republic of Haiti		Haiti			Haiti		2	1	7	2	10646714	14	19340	2017	2003	2016	7. Least developed region	5. Low income	-99	HA	HT	HTI	HTI	332
MultiPolygon (((-71.70830481635805143 18.04499705654609443, -71.68773759630587961 18.31666006110447142, -71.94511206733555753 18.61690013272026079, -71.70130265978249895 18.78541697842405256, -71.62487321642282723 19.16983795824330628, -71.71236141629296412 19.71445587816735667, -71.58730445014663246 19.88491059008210016, -70.80670610216174055 19.880285549391985, -70.21436499701613343 19.62288524…	Admin-0 country	1	5	Dominican Republic	DOM	0	2	Sovereign country	Dominican Republic	DOM	0	Dominican Republic	DOM	0	Dominican Republic	DOM	0	Dominican Rep.	Dominican Republic	DOM	Dominican Rep.		Dom. Rep.	DO	Dominican Republic		Dominican Republic			Dominican Republic		5	2	5	7	10734247	14	161900	2017	2010	2016	6. Developing region	3. Upper middle income	-99	DR	DO	DOM	DOM	214
MultiPolygon (((178.72530000000000427 71.09879999999999711, 180.00000000000005684 71.51571433642828879, 180.00000000000005684 70.8321992085467258, 178.90342499999997017 70.78114000000000772, 178.72530000000000427 71.09879999999999711)),((49.10116000000010672 46.39933000000013408, 48.64541000000008353 45.80629000000010365, 47.67590999999998758 45.64149000000014667, 46.68201000000004797 44.60920000…	Admin-0 country	1	2	Russia	RUS	0	2	Sovereign country	Russia	RUS	0	Russia	RUS	0	Russia	RUS	0	Russia	Russian Federation	RUS	Russia		Rus.	RUS	Russian Federation		Russia			Russian Federation		2	5	7	7	142257519	17	3745000	2017	2010	2016	3. Emerging region: BRIC	3. Upper middle income	-99	RS	RU	RUS	RUS	643
MultiPolygon (((-78.98000000000000398 26.7900000000000027, -78.51000000000000512 26.87000000000000455, -77.85000000000000853 26.83999999999999986, -77.82000000000000739 26.5800000000000054, -78.9100000000000108 26.42000000000000171, -78.98000000000000398 26.7900000000000027)),((-77.79000000000000625 27.0400000000000027, -77 26.58999999999999986, -77.17255000000000109 25.87918000000000163, -77.356…	Admin-0 country	1	4	The Bahamas	BHS	0	2	Sovereign country	The Bahamas	BHS	0	The Bahamas	BHS	0	The Bahamas	BHS	0	Bahamas	Bahamas	BHS	Bahamas		Bhs.	BS	Commonwealth of the Bahamas		Bahamas, The			Bahamas, The		1	1	2	5	329988	10	9066	2017	2010	2016	6. Developing region	2. High income: nonOECD	-99	BF	BS	BHS	BHS	44
MultiPolygon (((-61.20000000000000284 -51.85000000000000142, -60 -51.25, -59.14999999999999858 -51.5, -58.55000000000000426 -51.10000000000000853, -57.75 -51.54999999999999716, -58.05000000000000426 -51.90000000000000568, -59.40000000000000568 -52.19999999999999574, -59.85000000000000853 -51.85000000000000142, -60.70000000000000284 -52.30000000000000426, -61.20000000000000284 -51.8500000000000014…	Admin-0 country	1	5	United Kingdom	GB1	1	2	Dependency	Falkland Islands	FLK	0	Falkland Islands	FLK	0	Falkland Islands	FLK	1	Falkland Is.	Falkland Islands	B12	Falkland Is.		Flk. Is.	FK	Falkland Islands		Falkland Islands (Islas Malvinas)	U.K.	Admin. by U.K.; Claimed by Argentina	Falkland Islands	Islas Malvinas	6	6	6	3	2931	4	281.8	2014	-99	2012	2. Developed region: nonG7	1. High income: OECD	-99	FK	FK	FLK	FLK	238
MultiPolygon (((15.14282000000000217 79.67431000000000552, 15.52255000000000074 80.01608000000000231, 16.99085000000000178 80.05086000000000013, 18.25183000000000177 79.70175000000000409, 21.54382999999999981 78.95610999999999535, 19.02737000000000123 78.56260000000000332, 18.47172000000000125 77.82668999999999926, 17.59440999999999988 77.63796000000000674, 17.11820000000000164 76.809409999999999…	Admin-0 country	1	3	Norway	NOR	0	2	Sovereign country	Norway	NOR	0	Norway	NOR	0	Norway	NOR	0	Norway	Norway	NOR	Norway		Nor.	N	Kingdom of Norway		Norway			Norway		5	3	8	12	5320045	13	364700	2017	2001	2016	2. Developed region: nonG7	1. High income: OECD	-99	-99	-99	-99	-99	-99
MultiPolygon (((-46.76379000000000019 82.62796000000000163, -43.40644000000000347 83.22516000000001668, -39.89753000000000327 83.1801799999999929, -38.62214000000000169 83.54904999999999404, -35.08787000000000234 83.64513000000000886, -27.10046000000000177 83.51966000000000179, -20.84538999999999831 82.72668999999999073, -22.69181999999999988 82.34165000000000134, -26.51753000000000071 82.2976500…	Admin-0 country	1	3	Denmark	DN1	1	2	Country	Greenland	GRL	0	Greenland	GRL	0	Greenland	GRL	0	Greenland	Greenland	GRL	Greenland		Grlnd.	GL	Greenland		Greenland	Den.		Greenland		4	1	3	12	57713	8	2173	2017	2010	2015	2. Developed region: nonG7	2. High income: nonOECD	-99	GL	GL	GRL	GRL	304
MultiPolygon (((68.93500000000000227 -48.62500000000000711, 69.57999999999999829 -48.94000000000000483, 70.52500000000000568 -49.06500000000000483, 70.56000000000000227 -49.25500000000000256, 70.28000000000000114 -49.71000000000000085, 68.74500000000000455 -49.77500000000000568, 68.72000000000001307 -49.24249999999999972, 68.86750000000000682 -48.8300000000000054, 68.93500000000000227 -48.6250000…	Admin-0 country	3	6	France	FR1	1	2	Dependency	French Southern and Antarctic Lands	ATF	0	French Southern and Antarctic Lands	ATF	0	French Southern and Antarctic Lands	ATF	0	Fr. S. Antarctic Lands	French Southern and Antarctic Lands	ATF	Fr. S. and Antarctic Lands		Fr. S.A.L.	TF	Territory of the French Southern and Antarctic Lands			Fr.		French Southern and Antarctic Lands		7	5	9	11	140	1	16	2017	-99	2016	6. Developing region	2. High income: nonOECD	-99	FS	TF	ATF	ATF	260
MultiPolygon (((124.96868248911623311 -8.89279021569708306, 125.08624637258026269 -8.65688730228468017, 125.94707238169826269 -8.43209482181503489, 126.64470421763854802 -8.39824675866385206, 126.95724328013983495 -8.27334482181439768, 127.33592817597462954 -8.39731658288260263, 126.96799197805654558 -8.66825611738889279, 125.92588504445859598 -9.10600717533335313, 125.08852013560108674 -9.393173…	Admin-0 country	1	5	East Timor	TLS	0	2	Sovereign country	East Timor	TLS	0	East Timor	TLS	0	East Timor	TLS	0	Timor-Leste	Timor-Leste	TLS	Timor-Leste		T.L.	TL	Democratic Republic of Timor-Leste		Timor-Leste			Timor-Leste	East Timor	2	2	4	3	1291358	12	4975	2017	2010	2016	7. Least developed region	4. Lower middle income	-99	TT	TL	TLS	TLS	626
MultiPolygon (((16.34497684089524228 -28.57670501069770097, 16.82401736824090221 -28.08216155366446998, 17.21892866381540443 -28.35594329194681151, 17.38749718595150284 -28.78351409272978145, 17.83615197110952977 -28.85637786226131851, 18.4648991228047521 -29.04546192801727855, 19.00212731291108526 -28.97244312918886777, 19.89473432788861373 -28.46110483166077643, 19.8957678565344338 -24.76779021…	Admin-0 country	1	2	South Africa	ZAF	0	2	Sovereign country	South Africa	ZAF	0	South Africa	ZAF	0	South Africa	ZAF	0	South Africa	South Africa	ZAF	South Africa		S.Af.	ZA	Republic of South Africa		South Africa			South Africa		2	3	4	2	54841552	16	739100	2017	2001	2016	5. Emerging region: G20	3. Upper middle income	-99	SF	ZA	ZAF	ZAF	710
MultiPolygon (((28.97826256685724289 -28.95559661226171144, 29.32516645683259071 -29.25738697684625578, 29.01841515474802691 -29.74376555757736895, 28.84839969250774061 -30.07005055106825608, 28.29106937023991009 -30.22621672945430049, 28.10720462414542453 -30.54573211031495106, 27.74939700695648526 -30.64510588961222481, 26.99926191580763657 -29.87595387137998415, 27.5325110206274779 -29.2427108…	Admin-0 country	1	6	Lesotho	LSO	0	2	Sovereign country	Lesotho	LSO	0	Lesotho	LSO	0	Lesotho	LSO	0	Lesotho	Lesotho	LSO	Lesotho		Les.	LS	Kingdom of Lesotho		Lesotho			Lesotho		1	5	2	8	1958042	12	6019	2017	2006	2016	7. Least developed region	4. Lower middle income	-99	LT	LS	LSO	LSO	426
MultiPolygon (((-117.12775999999985288 32.5353399999999624, -115.99134999999995443 32.61239000000011856, -114.72138999999992848 32.72082999999992126, -114.81499999999999773 32.5252800000000093, -113.30498000000000047 32.03914000000008855, -111.02361000000001923 31.3347199999999475, -109.03500000000002501 31.34194000000013602, -108.24193999999994276 31.34222000000005437, -108.24000000000000909 31.…	Admin-0 country	1	2	Mexico	MEX	0	2	Sovereign country	Mexico	MEX	0	Mexico	MEX	0	Mexico	MEX	0	Mexico	Mexico	MEX	Mexico		Mex.	MX	United Mexican States		Mexico			Mexico		6	1	7	3	124574795	17	2307000	2017	2010	2016	4. Emerging region: MIKT	3. Upper middle income	-99	MX	MX	MEX	MEX	484
MultiPolygon (((-57.62513342958295937 -30.21629485445426155, -56.97602576356473492 -30.10968637463612652, -55.97324459494093674 -30.88307586031630336, -55.60151017924934536 -30.85387867607139256, -54.57245154480511928 -31.4945114071937482, -53.78795162618219194 -32.04724252698762399, -53.20958899597154357 -32.72766611097472378, -53.65054399271809871 -33.20200408298182992, -53.37366166849824367 -3…	Admin-0 country	1	4	Uruguay	URY	0	2	Sovereign country	Uruguay	URY	0	Uruguay	URY	0	Uruguay	URY	0	Uruguay	Uruguay	URY	Uruguay		Ury.	UY	Oriental Republic of Uruguay		Uruguay			Uruguay		1	2	2	10	3360148	12	73250	2017	2004	2016	5. Emerging region: G20	3. Upper middle income	-99	UY	UY	URY	URY	858
MultiPolygon (((-53.37366166849824367 -33.7683777809007637, -53.65054399271809871 -33.20200408298182992, -53.20958899597154357 -32.72766611097472378, -53.78795162618219194 -32.04724252698762399, -54.57245154480511928 -31.4945114071937482, -55.60151017924934536 -30.85387867607139256, -55.97324459494093674 -30.88307586031630336, -56.97602576356473492 -30.10968637463612652, -57.62513342958295937 -30…	Admin-0 country	1	2	Brazil	BRA	0	2	Sovereign country	Brazil	BRA	0	Brazil	BRA	0	Brazil	BRA	0	Brazil	Brazil	BRA	Brazil		Brazil	BR	Federative Republic of Brazil		Brazil			Brazil		5	6	5	7	207353391	17	3081000	2017	2010	2016	3. Emerging region: BRIC	3. Upper middle income	-99	BR	BR	BRA	BRA	76
MultiPolygon (((-69.52967810736495835 -10.95173430750219445, -68.78615759954948317 -11.03638030359627997, -68.27125362819326426 -11.01452117273682063, -68.04819230820538678 -10.71205901453248543, -67.17380123561073901 -10.30681243249961199, -66.64690833196280551 -9.93133147546686246, -65.33843522811642401 -9.76198780684639189, -65.44483700220538935 -10.51145110437543195, -65.32189876978301868 -10…	Admin-0 country	1	3	Bolivia	BOL	0	2	Sovereign country	Bolivia	BOL	0	Bolivia	BOL	0	Bolivia	BOL	0	Bolivia	Bolivia	BOL	Bolivia		Bolivia	BO	Plurinational State of Bolivia		Bolivia			Bolivia		1	5	2	3	11138234	14	78350	2017	2001	2016	5. Emerging region: G20	4. Lower middle income	-99	BL	BO	BOL	BOL	68
MultiPolygon (((-69.8936352199966251 -4.29818694419432745, -70.79476884630230415 -4.25126474367330331, -70.92884334988357864 -4.40159148521036769, -71.74840572781654657 -4.59398284263301093, -72.89192765978725674 -5.27456145591698089, -72.96450720894119968 -5.74125131594489346, -73.21971126981460998 -6.08918873456607823, -73.12002743192360299 -6.62993092206823942, -73.72448666044164156 -6.9185954…	Admin-0 country	1	2	Peru	PER	0	2	Sovereign country	Peru	PER	0	Peru	PER	0	Peru	PER	0	Peru	Peru	PER	Peru		Peru	PE	Republic of Peru		Peru			Peru		4	4	4	11	31036656	15	410400	2017	2007	2016	5. Emerging region: G20	3. Upper middle income	-99	PE	PE	PER	PER	604
MultiPolygon (((-66.87632585312258016 1.253360500489336, -67.06504818385249678 1.13011220947322499, -67.25999752467359372 1.71999868408495615, -67.53781002467469818 2.03716278727632982, -67.86856502955883741 1.69245514567339228, -69.81697323269162325 1.71480520263962433, -69.80459672715772967 1.0890811222334662, -69.21863766140018015 0.98567658121743307, -69.25243404811905634 0.60265086507007481,…	Admin-0 country	1	2	Colombia	COL	0	2	Sovereign country	Colombia	COL	0	Colombia	COL	0	Colombia	COL	0	Colombia	Colombia	COL	Colombia		Col.	CO	Republic of Colombia		Colombia			Colombia		2	1	3	1	47698524	15	688000	2017	2006	2016	6. Developing region	3. Upper middle income	-99	CO	CO	COL	COL	170
MultiPolygon (((-77.3533607652738624 8.6705046655580702, -77.47472286651132833 8.52428620038821805, -77.2425664944400836 7.9352782251254439, -77.43110795765699095 7.63806122479873384, -77.75341386586140402 7.70983978925214331, -77.88157141794525273 7.22377126711478468, -78.21493608266011677 7.51225495038416113, -78.42916073272607491 8.05204112388892668, -78.18209570993863622 8.31918244062177337, …	Admin-0 country	1	4	Panama	PAN	0	2	Sovereign country	Panama	PAN	0	Panama	PAN	0	Panama	PAN	0	Panama	Panama	PAN	Panama		Pan.	PA	Republic of Panama		Panama			Panama		4	4	6	3	3753142	12	93120	2017	2010	2016	6. Developing region	3. Upper middle income	-99	PM	PA	PAN	PAN	591
MultiPolygon (((-82.54619625520348336 9.5661347518246771, -82.93289099804357534 9.47681203860817334, -82.92715491405915884 9.07433014570291618, -82.71918311230052723 8.92570872643149471, -82.86865719270477371 8.80726634361852234, -82.82977067740516475 8.62629547773236993, -82.91317643912421431 8.42351715741907014, -82.96578304719736252 8.22502798098598475, -83.508437262694315 8.44692658124728268,…	Admin-0 country	1	5	Costa Rica	CRI	0	2	Sovereign country	Costa Rica	CRI	0	Costa Rica	CRI	0	Costa Rica	CRI	0	Costa Rica	Costa Rica	CRI	Costa Rica		C.R.	CR	Republic of Costa Rica		Costa Rica			Costa Rica		3	2	4	2	4930258	12	79260	2017	2011	2016	5. Emerging region: G20	3. Upper middle income	-99	CS	CR	CRI	CRI	188
MultiPolygon (((-83.655611741861577 10.93876414636142158, -83.89505449088595412 10.72683909753244613, -84.1901785957048503 10.79345001875667442, -84.35593075228103999 10.99922557214290464, -84.67306901725626744 11.08265717207814305, -84.90300330273895213 10.95230337162189649, -85.56185197624419914 11.21711924890159651, -85.71254045280730338 11.08844493249482355, -86.05848832878525911 11.403438625…	Admin-0 country	1	5	Nicaragua	NIC	0	2	Sovereign country	Nicaragua	NIC	0	Nicaragua	NIC	0	Nicaragua	NIC	0	Nicaragua	Nicaragua	NIC	Nicaragua		Nic.	NI	Republic of Nicaragua		Nicaragua			Nicaragua		1	4	1	9	6025951	13	33550	2017	2005	2016	6. Developing region	4. Lower middle income	-99	NU	NI	NIC	NIC	558
MultiPolygon (((-83.14721900097413254 14.99582916916411079, -83.48998877636611837 15.01626719813553734, -83.62858496777292316 14.88007396083030187, -83.97572140169359045 14.74943593999648783, -84.22834164095240794 14.74876414637662947, -84.44933590364860265 14.62161428472251146, -84.64958207877964469 14.66680532476186727, -84.82003679069435975 14.81958669683267082, -84.9245006985724018 14.7904928…	Admin-0 country	1	5	Honduras	HND	0	2	Sovereign country	Honduras	HND	0	Honduras	HND	0	Honduras	HND	0	Honduras	Honduras	HND	Honduras		Hond.	HN	Republic of Honduras		Honduras			Honduras		2	5	2	5	9038741	13	43190	2017	2001	2016	6. Developing region	4. Lower middle income	-99	HO	HN	HND	HND	340
MultiPolygon (((-89.3533259752828144 14.42413279871908571, -89.05851192905765856 14.34002940516408664, -88.84307288283284265 14.14050670008517052, -88.54123084181600234 13.9801547306834788, -88.50399797234970833 13.84548594813085742, -88.06534257684013767 13.96462596277977752, -87.85951534702161325 13.89331248621709847, -87.72350297722940127 13.78505036056550637, -87.79311113152657242 13.38448049…	Admin-0 country	1	6	El Salvador	SLV	0	2	Sovereign country	El Salvador	SLV	0	El Salvador	SLV	0	El Salvador	SLV	0	El Salvador	El Salvador	SLV	El Salvador		El. S.	SV	Republic of El Salvador		El Salvador			El Salvador		1	4	6	8	6172011	13	54790	2017	2007	2016	6. Developing region	4. Lower middle income	-99	ES	SV	SLV	SLV	222
MultiPolygon (((-92.22775000686982594 14.53882864019092835, -92.20322953974732627 14.83010285080406909, -92.08721594925206944 15.06458466232844096, -92.22924862340630625 15.2514466414958747, -91.74796017125595426 16.06656484625176518, -90.46447262242266163 16.06956207932465475, -90.43886695022203526 16.41010976812809474, -90.6008467272409348 16.47077789963879013, -90.71182186558772287 16.68748301…	Admin-0 country	1	3	Guatemala	GTM	0	2	Sovereign country	Guatemala	GTM	0	Guatemala	GTM	0	Guatemala	GTM	0	Guatemala	Guatemala	GTM	Guatemala		Guat.	GT	Republic of Guatemala		Guatemala			Guatemala		3	3	3	6	15460732	14	131800	2017	2002	2016	6. Developing region	4. Lower middle income	-99	GT	GT	GTM	GTM	320
MultiPolygon (((-89.14308041050333031 17.80831899664940465, -89.15090938999553316 17.95546763760042097, -89.02985734735182177 18.0015113387724881, -88.84834387892661312 17.88319814704023258, -88.49012285027934865 18.48683055264160657, -88.30003109409369699 18.49998220465990073, -88.29633622918481706 18.35327281338327055, -88.10681291375438207 18.34867361090928739, -88.12347856316850425 18.0766747…	Admin-0 country	1	6	Belize	BLZ	0	2	Sovereign country	Belize	BLZ	0	Belize	BLZ	0	Belize	BLZ	0	Belize	Belize	BLZ	Belize		Belize	BZ	Belize		Belize			Belize		1	4	5	7	360346	10	3088	2017	2010	2016	6. Developing region	4. Lower middle income	-99	BH	BZ	BLZ	BLZ	84
MultiPolygon (((-60.73357418480372161 5.20027720786190084, -60.60117916527194382 4.91809804933213002, -60.96689327660153879 4.53646759685663881, -62.08542965355913168 4.16212352133430841, -62.80453304711670626 4.00696503337795207, -63.0931975978991062 3.77057119385878536, -63.88834286157415931 4.02053009685457141, -64.62865943058754681 4.14848094320925043, -64.81606401229402081 4.0564452172974228…	Admin-0 country	1	3	Venezuela	VEN	0	2	Sovereign country	Venezuela	VEN	0	Venezuela	VEN	0	Venezuela	VEN	0	Venezuela	Venezuela	VEN	Venezuela		Ven.	VE	Bolivarian Republic of Venezuela	República Bolivariana de Venezuela	Venezuela			Venezuela, RB		1	3	1	4	31304016	15	468600	2017	2001	2016	5. Emerging region: G20	3. Upper middle income	-99	VE	VE	VEN	VEN	862
MultiPolygon (((-56.5393857489145546 1.89952260986692067, -56.78270423036082803 1.86371084228865413, -57.33582292339690412 1.94853770589575936, -57.66097103537737212 1.68258494710563866, -58.11344987652501715 1.50719513590702525, -58.42947709820596458 1.46394196207872085, -58.54001298687829546 1.26808828369252069, -59.03086157900264652 1.31769765869272248, -59.64604366722125661 1.7868938256867890…	Admin-0 country	1	4	Guyana	GUY	0	2	Sovereign country	Guyana	GUY	0	Guyana	GUY	0	Guyana	GUY	0	Guyana	Guyana	GUY	Guyana		Guy.	GY	Co-operative Republic of Guyana		Guyana			Guyana		3	1	4	8	737718	11	6093	2017	2002	2016	6. Developing region	4. Lower middle income	-99	GY	GY	GUY	GUY	328
MultiPolygon (((-54.52475419779971588 2.31184886312378524, -55.09758744975513878 2.5237480737366127, -55.56975501160599862 2.42150625244713069, -55.97332210958937537 2.51036387777301684, -56.07334184429029733 2.22079498942549947, -55.90560014507088482 2.02199575439865953, -55.99569800477175363 1.81766714111660121, -56.5393857489145546 1.89952260986692067, -57.15009782573991259 2.76892690674540631…	Admin-0 country	1	4	Suriname	SUR	0	2	Sovereign country	Suriname	SUR	0	Suriname	SUR	0	Suriname	SUR	0	Suriname	Suriname	SUR	Suriname		Sur.	SR	Republic of Suriname		Suriname			Suriname		1	4	7	6	591919	11	8547	2017	2004	2016	6. Developing region	3. Upper middle income	-99	NS	SR	SUR	SUR	740
MultiPolygon (((-51.65779741067888864 4.15623240805302885, -52.24933753112395607 3.24109446859624484, -52.55642473001842063 2.50470530843705319, -52.93965715189495569 2.12485769287563642, -53.41846513529530682 2.05338918701598061, -53.55483924011354446 2.3348965519259508, -53.77852067728891683 2.37670278565008175, -54.08806250671725024 2.105556545414629, -54.52475419779971588 2.31184886312378524,…	Admin-0 country	1	2	France	FR1	1	2	Country	France	FRA	0	France	FRA	0	France	FRA	0	France	France	FRA	France		Fr.	F	French Republic		France			France		7	5	9	11	67106161	16	2699000	2017	-99	2016	1. Developed region: G7	1. High income: OECD	-99	FR	-99	-99	FRA	250
MultiPolygon (((-75.37322323271385471 -0.15203175212045039, -75.2337227037419467 -0.91141692464952939, -75.54499569365204081 -1.56160979574588032, -76.63539425322672116 -2.60867766684381763, -77.83790483265860871 -3.00302052166310318, -78.45068396677564238 -3.87309661216137613, -78.63989722361233703 -4.54778411216407363, -79.20528906931772894 -4.95912851320738923, -79.62497921417617874 -4.4541980…	Admin-0 country	1	3	Ecuador	ECU	0	2	Sovereign country	Ecuador	ECU	0	Ecuador	ECU	0	Ecuador	ECU	0	Ecuador	Ecuador	ECU	Ecuador		Ecu.	EC	Republic of Ecuador		Ecuador			Ecuador		1	5	2	12	16290913	14	182400	2017	2010	2016	6. Developing region	3. Upper middle income	-99	EC	EC	ECU	ECU	218
MultiPolygon (((-66.28243445500821451 18.51476166429536363, -65.77130286320929997 18.42667918545387806, -65.59100379094294908 18.2280349797239154, -65.84716386581376923 17.97590566657186173, -66.59993445500948894 17.98182261806927329, -67.18416236028527067 17.94655345303007721, -67.2424275376943541 18.37446015062293725, -67.10067908391773983 18.52060110114435076, -66.28243445500821451 18.51476166…	Admin-0 country	1	5	United States of America	US1	1	2	Dependency	Puerto Rico	PRI	0	Puerto Rico	PRI	0	Puerto Rico	PRI	0	Puerto Rico	Puerto Rico	PRI	Puerto Rico		P.R.	PR	Commonwealth of Puerto Rico		Puerto Rico	Commonwealth of U.S.A.		Puerto Rico		4	5	1	1	3351827	12	131000	2017	2010	2016	6. Developing region	2. High income: nonOECD	-99	RQ	PR	PRI	PRI	630
MultiPolygon (((-77.56960079619921089 18.49052541755048651, -76.89661861846212787 18.40086680752408199, -76.36535905628554133 18.16070058844759672, -76.19965857614164406 17.88686717373296631, -76.90256140817569985 17.8682378198917462, -77.20634131540347767 17.70111623785982147, -77.76602291534061351 17.86159739834224069, -78.33771928578561017 18.22596792243223263, -78.21772661000387927 18.4545327…	Admin-0 country	1	4	Jamaica	JAM	0	2	Sovereign country	Jamaica	JAM	0	Jamaica	JAM	0	Jamaica	JAM	0	Jamaica	Jamaica	JAM	Jamaica		Jam.	J	Jamaica		Jamaica			Jamaica		1	2	4	10	2990561	12	25390	2017	2011	2016	6. Developing region	3. Upper middle income	-99	JM	JM	JAM	JAM	388
MultiPolygon (((-82.26815121125706298 23.18861074471770678, -81.40445716014683342 23.11727142993878203, -80.61876868358119452 23.10598012948300095, -79.67952368846025024 22.76530324959882989, -79.28148596873208476 22.39920156502705595, -78.34743445505648651 22.51216624601708816, -77.99329586456028096 22.27719350838593471, -77.14642249216105085 21.65785146736783418, -76.523824835908556 21.20681956…	Admin-0 country	1	3	Cuba	CUB	0	2	Sovereign country	Cuba	CUB	0	Cuba	CUB	0	Cuba	CUB	0	Cuba	Cuba	CUB	Cuba		Cuba	CU	Republic of Cuba		Cuba			Cuba		3	5	3	4	11147407	14	132900	2017	2002	2016	5. Emerging region: G20	3. Upper middle income	-99	CU	CU	CUB	CUB	192
MultiPolygon (((31.19140913262128834 -22.25150969817239854, 30.65986535006708991 -22.15156747811991522, 30.32288333509177392 -22.27161183033393499, 29.83903689954297178 -22.10221648528117555, 29.43218834810904028 -22.09131275806758765, 28.7946562029242159 -21.63945403410745172, 28.0213700701086168 -21.48597503020058497, 27.72722781750325893 -20.8518018531147149, 27.72474734875325453 -20.499058526…	Admin-0 country	1	3	Zimbabwe	ZWE	0	2	Sovereign country	Zimbabwe	ZWE	0	Zimbabwe	ZWE	0	Zimbabwe	ZWE	0	Zimbabwe	Zimbabwe	ZWE	Zimbabwe		Zimb.	ZW	Republic of Zimbabwe		Zimbabwe			Zimbabwe		1	5	3	9	13805084	14	28330	2017	2002	2016	5. Emerging region: G20	5. Low income	-99	ZI	ZW	ZWE	ZWE	716
MultiPolygon (((29.43218834810904028 -22.09131275806758765, 28.01723595552525126 -22.82775359465907883, 27.11940962088624474 -23.57432301197977509, 26.78640669119741347 -24.24069060638348461, 26.48575320812329892 -24.6163265927131043, 25.94165205252215856 -24.69637338633322088, 25.76584882986520952 -25.17484547292367836, 25.66466637543771867 -25.4868160946697131, 25.02517052582578572 -25.71967009…	Admin-0 country	1	4	Botswana	BWA	0	2	Sovereign country	Botswana	BWA	0	Botswana	BWA	0	Botswana	BWA	0	Botswana	Botswana	BWA	Botswana		Bwa.	BW	Republic of Botswana		Botswana			Botswana		6	5	7	3	2214858	12	35900	2017	2011	2016	6. Developing region	3. Upper middle income	-99	BC	BW	BWA	BWA	72
MultiPolygon (((19.8957678565344338 -24.76779021576059137, 19.89473432788861373 -28.46110483166077643, 19.00212731291108526 -28.97244312918886777, 18.4648991228047521 -29.04546192801727855, 17.83615197110952977 -28.85637786226131851, 17.38749718595150284 -28.78351409272978145, 17.21892866381540443 -28.35594329194681151, 16.82401736824090221 -28.08216155366446998, 16.34497684089524228 -28.57670501…	Admin-0 country	1	3	Namibia	NAM	0	2	Sovereign country	Namibia	NAM	0	Namibia	NAM	0	Namibia	NAM	0	Namibia	Namibia	NAM	Namibia		Nam.	NA	Republic of Namibia		Namibia			Namibia		4	1	1	7	2484780	12	25990	2017	2001	2016	6. Developing region	3. Upper middle income	-99	WA	NA	NAM	NAM	516
MultiPolygon (((-16.71372880702347175 13.59495860437985471, -17.12610673671261452 14.37351573328922427, -17.62504269049065897 14.72954051356407312, -17.18517289882223054 14.91947724045286172, -16.70070634608592286 15.62152741135410849, -16.46309811040788418 16.13503611903846036, -16.12069007004193111 16.45566254319338384, -15.62366614425869216 16.36933706304981229, -15.13573727055881868 16.587282…	Admin-0 country	1	3	Senegal	SEN	0	2	Sovereign country	Senegal	SEN	0	Senegal	SEN	0	Senegal	SEN	0	Senegal	Senegal	SEN	Senegal		Sen.	SN	Republic of Senegal		Senegal			Senegal		2	6	5	5	14668522	14	39720	2017	2002	2016	7. Least developed region	4. Lower middle income	-99	SG	SN	SEN	SEN	686
MultiPolygon (((-11.51394283695059073 12.44298757572941838, -11.4678991357785236 12.75451894780097462, -11.55339779300543057 13.14121369064106659, -11.92771603031161476 13.42207510014739569, -12.12488745772125931 13.99472748458978799, -12.17075029138030118 14.61683421473550482, -11.83420752607946724 14.79909699142893942, -11.66607825361785444 15.38820831955629842, -11.34909501793950426 15.4112560…	Admin-0 country	1	3	Mali	MLI	0	2	Sovereign country	Mali	MLI	0	Mali	MLI	0	Mali	MLI	0	Mali	Mali	MLI	Mali		Mali	ML	Republic of Mali		Mali			Mali		1	4	1	7	17885245	14	38090	2017	2009	2016	7. Least developed region	5. Low income	-99	ML	ML	MLI	MLI	466
MultiPolygon (((-17.06342322434257142 20.99975210213082732, -16.845193650773993 21.33332347257487882, -12.92910193526353169 21.32707062426756295, -13.11875444177471195 22.77122020109625566, -12.87422156416957542 23.28483226164517816, -11.93722449385332141 23.37459422453616753, -11.96941891117116086 25.93335276946826795, -8.68729366701739991 25.88105621998890626, -8.68439978680905256 27.3957441268…	Admin-0 country	1	3	Mauritania	MRT	0	2	Sovereign country	Mauritania	MRT	0	Mauritania	MRT	0	Mauritania	MRT	0	Mauritania	Mauritania	MRT	Mauritania		Mrt.	MR	Islamic Republic of Mauritania		Mauritania			Mauritania		3	3	2	1	3758571	12	16710	2017	2000	2016	7. Least developed region	5. Low income	-99	MR	MR	MRT	MRT	478
MultiPolygon (((2.69170169435625439 6.25881724692862917, 1.86524051271231883 6.14215770102973124, 1.61895063640923809 6.83203807212623815, 1.66447757325838097 9.12859039960937935, 1.46304284018467001 9.33462433515708767, 1.42506066245013607 9.82539541263300009, 1.0777950374487375 10.17560659427502401, 0.77233564617148431 10.47080821374235882, 0.89956302247406938 10.99733938236425956, 1.2434696793…	Admin-0 country	1	5	Benin	BEN	0	2	Sovereign country	Benin	BEN	0	Benin	BEN	0	Benin	BEN	0	Benin	Benin	BEN	Benin		Benin	BJ	Republic of Benin		Benin			Benin		1	2	2	12	11038805	14	24310	2017	2002	2016	7. Least developed region	5. Low income	-99	BN	BJ	BEN	BEN	204
MultiPolygon (((14.85130000000003747 22.86295000000012578, 15.09688764818184836 21.30851878507490937, 15.47106000000007953 21.04845000000005939, 15.48714806485014606 20.73041453702563786, 15.90324669766431498 20.38761892341750581, 15.68574059414777366 19.95718008064238802, 15.30044111497971926 17.92794993740500331, 15.24773115404184409 16.62730581305078204, 13.97217000000000553 15.684370000000058…	Admin-0 country	1	3	Niger	NER	0	2	Sovereign country	Niger	NER	0	Niger	NER	0	Niger	NER	0	Niger	Niger	NER	Niger		Niger	NE	Republic of Niger		Niger			Niger		4	5	3	13	19245344	14	20150	2017	2001	2016	7. Least developed region	5. Low income	-99	NG	NE	NER	NER	562
MultiPolygon (((2.69170169435625439 6.25881724692862917, 2.7490625342002204 7.87073436119288772, 2.723792758809509 8.50684540448970949, 2.91230838381025592 9.13760793704432217, 3.22035159670210147 9.44415253339970207, 3.70543826662591869 10.06321035404020847, 3.60007002118280184 10.33218618411940781, 3.79711225751171355 10.73474559167310538, 3.57221642417746921 11.32793935795151974, 3.61118045412…	Admin-0 country	1	2	Nigeria	NGA	0	2	Sovereign country	Nigeria	NGA	0	Nigeria	NGA	0	Nigeria	NGA	0	Nigeria	Nigeria	NGA	Nigeria		Nigeria	NG	Federal Republic of Nigeria		Nigeria			Nigeria		3	2	5	2	190632261	17	1089000	2017	2006	2016	5. Emerging region: G20	4. Lower middle income	-99	NI	NG	NGA	NGA	566
MultiPolygon (((14.49578738776284581 12.85939626713732942, 14.89336000000002969 12.21904999999998154, 14.96015180833759928 11.55557404219722351, 14.92356489427496058 10.8913251815174732, 15.46787275560524222 9.98233673750354455, 14.90935387539471613 9.99212942142273164, 14.62720055508106043 9.92091929772453796, 14.17146609869902818 10.02137828209993131, 13.95421837734400583 9.54949494062668691, 1…	Admin-0 country	1	3	Cameroon	CMR	0	2	Sovereign country	Cameroon	CMR	0	Cameroon	CMR	0	Cameroon	CMR	0	Cameroon	Cameroon	CMR	Cameroon		Cam.	CM	Republic of Cameroon		Cameroon			Cameroon		1	4	1	3	24994885	15	77240	2017	2005	2016	6. Developing region	4. Lower middle income	-99	CM	CM	CMR	CMR	120
MultiPolygon (((0.89956302247406938 10.99733938236425956, 0.77233564617148431 10.47080821374235882, 1.0777950374487375 10.17560659427502401, 1.42506066245013607 9.82539541263300009, 1.46304284018467001 9.33462433515708767, 1.66447757325838097 9.12859039960937935, 1.61895063640923809 6.83203807212623815, 1.86524051271231883 6.14215770102973124, 1.06012169760492725 5.92883738852887632, 0.8369311865…	Admin-0 country	1	6	Togo	TGO	0	2	Sovereign country	Togo	TGO	0	Togo	TGO	0	Togo	TGO	0	Togo	Togo	TGO	Togo		Togo	TG	Togolese Republic	République Togolaise	Togo			Togo		3	1	3	5	7965055	13	11610	2017	2010	2016	7. Least developed region	5. Low income	-99	TO	TG	TGO	TGO	768
MultiPolygon (((0.02380252442370078 11.01868174890080354, -0.04978471515994442 10.7069178328839314, 0.3675799902453889 10.19121287682717991, 0.3659005061958851 9.46500397382948222, 0.46119184734212126 8.67722260175601434, 0.71202924968687853 8.31246450442382923, 0.49095747234224513 7.41174428957647535, 0.57038414877484911 6.91435862876718943, 0.83693118653633292 6.27997874595214878, 1.06012169760…	Admin-0 country	1	3	Ghana	GHA	0	2	Sovereign country	Ghana	GHA	0	Ghana	GHA	0	Ghana	GHA	0	Ghana	Ghana	GHA	Ghana		Ghana	GH	Republic of Ghana		Ghana			Ghana		5	3	1	4	27499924	15	120800	2017	2010	2016	6. Developing region	4. Lower middle income	-99	GH	GH	GHA	GHA	288
MultiPolygon (((-8.02994361004861901 10.20653493900171327, -7.89958980959237156 10.29738210697082756, -7.62275916180480895 10.14723623294679555, -6.85050655763505745 10.1389938419962391, -6.66646094402754841 10.43081065514844852, -6.49396501303726836 10.4113028019582714, -6.20522294760643067 10.52406077721913391, -6.05045203289226663 10.09636078535544357, -5.81692623536528686 10.22255463301219436…	Admin-0 country	1	3	Ivory Coast	CIV	0	2	Sovereign country	Ivory Coast	CIV	0	Ivory Coast	CIV	0	Ivory Coast	CIV	0	Côte d'Ivoire	Côte d'Ivoire	CIV	Côte d'Ivoire		I.C.	CI	Republic of Ivory Coast	Republic of Cote D'Ivoire	Cote D'ivoire			Côte d'Ivoire		4	6	3	3	24184810	15	87120	2017	1998	2016	6. Developing region	4. Lower middle income	-99	IV	CI	CIV	CIV	384
MultiPolygon (((-13.70047604008432529 12.58618296961019389, -13.21781816247823826 12.5758735213679671, -12.49905066573056445 12.33208995203105651, -12.27859900557344019 12.35444000899728678, -12.20356482588563374 12.46564769128940497, -11.65830095055793159 12.38658274988283559, -11.51394283695059073 12.44298757572941838, -11.45616858564827112 12.0768342147253378, -11.29757361494451118 12.07797109…	Admin-0 country	1	3	Guinea	GIN	0	2	Sovereign country	Guinea	GIN	0	Guinea	GIN	0	Guinea	GIN	0	Guinea	Guinea	GIN	Guinea		Gin.	GN	Republic of Guinea		Guinea			Guinea		6	3	7	2	12413867	14	16080	2017	1996	2016	7. Least developed region	5. Low income	-99	GV	GN	GIN	GIN	324
MultiPolygon (((-16.67745195155457338 12.3848515894010518, -16.14771684413058495 12.54776154220118656, -15.81657426600425431 12.51556712488334711, -15.5484769352740102 12.62817007084734655, -13.70047604008432529 12.58618296961019389, -13.71874365889951264 12.24718557377551065, -13.82827185714212526 12.14264415124904417, -13.74316077315741325 11.81126902917741184, -13.90079972986377577 11.67871898…	Admin-0 country	1	6	Guinea-Bissau	GNB	0	2	Sovereign country	Guinea-Bissau	GNB	0	Guinea-Bissau	GNB	0	Guinea-Bissau	GNB	0	Guinea-Bissau	Guinea-Bissau	GNB	Guinea-Bissau		GnB.	GW	Republic of Guinea-Bissau		Guinea-Bissau			Guinea-Bissau		3	5	3	4	1792338	12	2851	2017	2009	2016	7. Least developed region	5. Low income	-99	PU	GW	GNB	GNB	624
MultiPolygon (((-8.43929846844869758 7.68604279218173758, -8.48544552248534956 7.39520783124307002, -8.38545162600057381 6.91180064536874283, -8.60288021486861965 6.46756419517166048, -8.31134762209401856 6.19303314862108323, -7.99369259279588107 6.12618968345154258, -7.57015255373168827 5.70735219972590357, -7.53971513511176283 5.31334524171651879, -7.63536821128403087 5.18815908448945606, -7.71…	Admin-0 country	1	4	Liberia	LBR	0	2	Sovereign country	Liberia	LBR	0	Liberia	LBR	0	Liberia	LBR	0	Liberia	Liberia	LBR	Liberia		Liberia	LR	Republic of Liberia		Liberia			Liberia		2	3	4	9	4689021	12	3881	2017	2008	2016	7. Least developed region	5. Low income	-99	LI	LR	LBR	LBR	430
MultiPolygon (((-13.24655025883251547 8.90304861087150812, -12.71195756677307998 9.34271169681076685, -12.59671912276220951 9.62018830000197056, -12.42592851403756526 9.83583405195595617, -12.15033810062500486 9.8585716821643814, -11.91727739098865868 10.04698395430055768, -11.11748124840732999 10.04587291100628477, -10.83915198408330127 9.68824616133036898, -10.62239518883504097 9.26791006106827…	Admin-0 country	1	4	Sierra Leone	SLE	0	2	Sovereign country	Sierra Leone	SLE	0	Sierra Leone	SLE	0	Sierra Leone	SLE	0	Sierra Leone	Sierra Leone	SLE	Sierra Leone		S.L.	SL	Republic of Sierra Leone		Sierra Leone			Sierra Leone		1	4	1	7	6163195	13	10640	2017	2004	2016	7. Least developed region	5. Low income	-99	SL	SL	SLE	SLE	694
MultiPolygon (((-5.40434159994697438 10.37073680260914621, -5.47056494792900594 10.951269842976048, -5.19784257650864845 11.37514577885013978, -5.22094194174312065 11.71385895430722712, -4.42716610352380258 12.54264557540429514, -4.28040503581487997 13.22844350834974136, -4.00639075358722607 13.47248545984811585, -3.52280270019986119 13.33766164799861542, -3.10370683431275962 13.541266791228594, …	Admin-0 country	1	3	Burkina Faso	BFA	0	2	Sovereign country	Burkina Faso	BFA	0	Burkina Faso	BFA	0	Burkina Faso	BFA	0	Burkina Faso	Burkina Faso	BFA	Burkina Faso		B.F.	BF	Burkina Faso		Burkina Faso			Burkina Faso		2	1	5	11	20107509	15	32990	2017	2006	2016	7. Least developed region	5. Low income	-99	UV	BF	BFA	BFA	854
MultiPolygon (((27.37422610851749027 5.23394440350006107, 27.04406538260471038 5.12785268800483607, 26.40276085786254257 5.15087453859087052, 25.65045535655747244 5.25608775473712342, 25.27879845551430549 5.17040822999719207, 25.12883344900328098 4.92724477784778969, 24.80502892426241601 4.89724660890234986, 24.41053104014625319 5.10878408448913035, 23.29721398285013834 4.60969310141422284, 22.84…	Admin-0 country	1	4	Central African Republic	CAF	0	2	Sovereign country	Central African Republic	CAF	0	Central African Republic	CAF	0	Central African Republic	CAF	0	Central African Rep.	Central African Republic	CAF	Central African Rep.		C.A.R.	CF	Central African Republic		Central African Republic			Central African Republic		5	6	6	9	5625118	13	3206	2017	2003	2016	7. Least developed region	5. Low income	-99	CT	CF	CAF	CAF	140
MultiPolygon (((18.45306521980992898 3.50438589112334853, 18.39379235197114326 2.90044342692821999, 18.09427575040743363 2.36572154378805521, 17.89883548347958708 1.74183197672827816, 17.7741919287915664 0.85565867757108538, 17.82654015470325248 0.28892324462610475, 17.66355268725467909 -0.05808399821381727, 17.63864464688998623 -0.42483163818924652, 17.5237162614728561 -0.74383025472698705, 16.8…	Admin-0 country	1	4	Republic of the Congo	COG	0	2	Sovereign country	Republic of the Congo	COG	0	Republic of the Congo	COG	0	Republic of the Congo	COG	0	Congo	Republic of the Congo	COG	Republic of the Congo		Rep. Congo	CG	Republic of the Congo		Congo, Republic of the			Congo, Rep.		2	1	3	10	4954674	12	30270	2017	2007	2016	6. Developing region	4. Lower middle income	-99	CF	CG	COG	COG	178
MultiPolygon (((11.27644900884371282 2.26105093018087189, 11.75166548019979018 2.32675751383999341, 12.3593803239522213 2.19281220133944998, 12.95133385585560859 2.32161570882693979, 13.075822381246752 2.26709707275901451, 13.00311364101207801 1.8308963077833198, 13.28263146327881827 1.31418366129688047, 14.0266687354172177 1.39567739502115273, 14.27626590338695678 1.19692983642661943, 13.8433207…	Admin-0 country	1	4	Gabon	GAB	0	2	Sovereign country	Gabon	GAB	0	Gabon	GAB	0	Gabon	GAB	0	Gabon	Gabon	GAB	Gabon		Gabon	GA	Gabonese Republic		Gabon			Gabon		6	2	5	5	1772255	12	35980	2017	2003	2016	6. Developing region	3. Upper middle income	-99	GB	GA	GAB	GAB	266
MultiPolygon (((9.64915815597262849 2.28386607503773575, 11.27644900884371282 2.26105093018087189, 11.28507897303646246 1.05766185140001312, 9.83028405115564397 1.0678937849937995, 9.49288862472198502 1.0101195336914941, 9.30561323409625629 1.16091136311918319, 9.64915815597262849 2.28386607503773575)))	Admin-0 country	1	4	Equatorial Guinea	GNQ	0	2	Sovereign country	Equatorial Guinea	GNQ	0	Equatorial Guinea	GNQ	0	Equatorial Guinea	GNQ	0	Eq. Guinea	Equatorial Guinea	GNQ	Eq. Guinea		Eq. G.	GQ	Republic of Equatorial Guinea		Equatorial Guinea			Equatorial Guinea		4	1	4	8	778358	11	31770	2017	2002	2016	7. Least developed region	2. High income: nonOECD	-99	EK	GQ	GNQ	GNQ	226
MultiPolygon (((30.74000973142209503 -8.34000593035372084, 31.15775133695004939 -8.5945787473173656, 31.55634809746649694 -8.76204884199864154, 32.19186486179194162 -8.9303589819732565, 32.75937544122132294 -9.23059905358906008, 33.23138797377529841 -9.67672169356480083, 33.48568769708359127 -10.52555877039111465, 33.31531049981728643 -10.79654998132969723, 33.11428917820191486 -11.60719817469231…	Admin-0 country	1	3	Zambia	ZMB	0	2	Sovereign country	Zambia	ZMB	0	Zambia	ZMB	0	Zambia	ZMB	0	Zambia	Zambia	ZMB	Zambia		Zambia	ZM	Republic of Zambia		Zambia			Zambia		5	8	5	13	15972000	14	65170	2017	2010	2016	7. Least developed region	4. Lower middle income	-99	ZA	ZM	ZMB	ZMB	894
MultiPolygon (((32.75937544122132294 -9.23059905358906008, 33.73972000000009075 -9.41714999999999236, 33.94083772409652511 -9.69367384198028503, 34.27999999999997272 -10.16000000000002501, 34.5599890479993519 -11.52002003341592484, 34.28000613784197981 -12.28002532313250583, 34.5599890479993519 -13.57999765386687585, 34.9071513201361654 -13.56542489996056844, 35.26795617039800845 -13.887834161029…	Admin-0 country	1	6	Malawi	MWI	0	2	Sovereign country	Malawi	MWI	0	Malawi	MWI	0	Malawi	MWI	0	Malawi	Malawi	MWI	Malawi		Mal.	MW	Republic of Malawi		Malawi			Malawi		1	3	4	5	19196246	14	21200	2017	2008	2016	7. Least developed region	5. Low income	-99	MI	MW	MWI	MWI	454
MultiPolygon (((34.5599890479993519 -11.52002003341592484, 35.31239790216903884 -11.43914641687914724, 36.51408165868426181 -11.72093800216673465, 36.77515099462280546 -11.59453744878080528, 37.47128999999995358 -11.56875999999999749, 37.82763999999997395 -11.26878999999991038, 38.42755659358775233 -11.28520232508165577, 39.52099999999995816 -10.89688000000001011, 40.31659000000001924 -10.3170999…	Admin-0 country	1	3	Mozambique	MOZ	0	2	Sovereign country	Mozambique	MOZ	0	Mozambique	MOZ	0	Mozambique	MOZ	0	Mozambique	Mozambique	MOZ	Mozambique		Moz.	MZ	Republic of Mozambique		Mozambique			Mozambique		4	2	1	4	26573706	15	35010	2017	2007	2016	7. Least developed region	5. Low income	-99	MZ	MZ	MOZ	MOZ	508
MultiPolygon (((32.07166548028106945 -26.73382008230490925, 31.86806033705108021 -27.17792734142127742, 31.28277306491332865 -27.28587940847899773, 30.6859619483744801 -26.74384531016953304, 30.67660851412964007 -26.3980783017046079, 30.94966678235991253 -26.02264902110415079, 31.04407962415714906 -25.73145232513944336, 31.33315758639790261 -25.66019052500895015, 31.83777794772806047 -25.84333180…	Admin-0 country	1	4	eSwatini	SWZ	0	2	Sovereign country	eSwatini	SWZ	0	eSwatini	SWZ	0	eSwatini	SWZ	0	eSwatini	eSwatini	SWZ	eSwatini		eSw.	SW	Kingdom of eSwatini		eSwatini			eSwatini		3	6	2	5	1467152	12	11060	2017	2007	2016	6. Developing region	4. Lower middle income	-99	WZ	SZ	SWZ	SWZ	748
MultiPolygon (((12.99551720546517686 -4.78110320396188371, 12.6316117692657901 -4.99127125409293626, 12.46800418462973603 -5.24836150474500496, 12.4366882666608678 -5.68430388755924554, 12.18233686692025231 -5.78993051516383872, 11.9149630062420897 -5.0379867488847907, 12.31860761887392641 -4.60623015708618766, 12.62075971848449285 -4.43802336997613622, 12.99551720546517686 -4.78110320396188371))…	Admin-0 country	1	3	Angola	AGO	0	2	Sovereign country	Angola	AGO	0	Angola	AGO	0	Angola	AGO	0	Angola	Angola	AGO	Angola		Ang.	AO	People's Republic of Angola		Angola			Angola		3	2	6	1	29310273	15	189000	2017	1970	2016	7. Least developed region	3. Upper middle income	-99	AO	AO	AGO	AGO	24
MultiPolygon (((30.4696736457612225 -2.41385475710134001, 30.52766000000002578 -2.80761999999998579, 30.74301000000002659 -3.0343099999999481, 30.75224000000008573 -3.35930999999999358, 30.50553999999999633 -3.56857999999994036, 30.11632000000003018 -4.09012000000001308, 29.75351240409986531 -4.45238941815330236, 29.33999759290034604 -4.49998341229409249, 29.2763839047490535 -3.29390715903406317,…	Admin-0 country	1	6	Burundi	BDI	0	2	Sovereign country	Burundi	BDI	0	Burundi	BDI	0	Burundi	BDI	0	Burundi	Burundi	BDI	Burundi		Bur.	BI	Republic of Burundi		Burundi			Burundi		2	2	5	8	11466756	14	7892	2017	2008	2016	7. Least developed region	5. Low income	-99	BY	BI	BDI	BDI	108
MultiPolygon (((35.71991824722275055 32.70919240979486631, 35.54566531753454228 32.39399201103057635, 35.18393029149143558 32.5325106877889425, 34.97464074070933293 31.86658234305972215, 35.22589155451242959 31.75434113212176612, 34.97050662612599581 31.61677846936080982, 34.92740848159456846 31.35343537040141371, 35.39756066258604505 31.48908600516758227, 35.42091840998196517 31.1000658228743560…	Admin-0 country	1	4	Israel	IS1	1	2	Country	Israel	ISR	0	Israel	ISR	0	Israel	ISR	0	Israel	Israel	ISR	Israel		Isr.	IS	State of Israel		Israel			Israel		3	2	5	9	8299706	13	297000	2017	2009	2016	2. Developed region: nonG7	1. High income: OECD	-99	-99	IL	ISR	ISR	376
MultiPolygon (((35.82110070165023785 33.27742645927629894, 35.55279666519081161 33.264274807258019, 35.46070926284670577 33.08904002535628308, 35.12605268732454533 33.09090037691878194, 35.48220665868012702 33.90545014091944154, 35.97959231948939873 34.61005829521913313, 35.99840254084364233 34.64491404880000402, 36.44819420751210259 34.59393524834406719, 36.61175011571589266 34.20178864189718126…	Admin-0 country	1	5	Lebanon	LBN	0	2	Sovereign country	Lebanon	LBN	0	Lebanon	LBN	0	Lebanon	LBN	0	Lebanon	Lebanon	LBN	Lebanon		Leb.	LB	Lebanese Republic		Lebanon			Lebanon		4	4	4	12	6229794	13	85160	2017	1970	2016	6. Developing region	3. Upper middle income	-99	LE	LB	LBN	LBN	422
MultiPolygon (((49.54351891459575086 -12.46983285894055449, 49.80898074727909375 -12.89528492599955456, 50.05651085795716426 -13.55576140712198452, 50.2174312681140691 -14.75878875087679631, 50.47653689962552903 -15.22651213955054317, 50.37711144389595574 -15.70606943121912735, 50.20027469259318309 -16.00026336025676699, 49.86060550313867878 -15.41425261806691793, 49.67260664246086321 -15.7102035…	Admin-0 country	1	3	Madagascar	MDG	0	2	Sovereign country	Madagascar	MDG	0	Madagascar	MDG	0	Madagascar	MDG	0	Madagascar	Madagascar	MDG	Madagascar		Mad.	MG	Republic of Madagascar		Madagascar			Madagascar		6	5	2	3	25054161	15	36860	2017	1993	2016	7. Least developed region	5. Low income	-99	MA	MG	MDG	MDG	450
MultiPolygon (((35.39756066258604505 31.48908600516758227, 34.92740848159456846 31.35343537040141371, 34.97050662612599581 31.61677846936080982, 35.22589155451242959 31.75434113212176612, 34.97464074070933293 31.86658234305972215, 35.18393029149143558 32.5325106877889425, 35.54566531753454228 32.39399201103057635, 35.54525190607620289 31.78250478772083909, 35.39756066258604505 31.4890860051675822…	Admin-0 country	1	5	Israel	IS1	1	2	Disputed	Palestine	PSX	0	Palestine	PSX	0	Palestine	PSX	0	Palestine	Palestine	PSX	Palestine		Pal.	PAL	West Bank and Gaza			Partial self-admin.	Partial self-admin.	Palestine (West Bank and Gaza)		3	2	5	8	4543126	12	21220.77	2017	2007	2016	6. Developing region	4. Lower middle income	-99	-99	PS	PSE	PSE	275
MultiPolygon (((-16.71372880702347175 13.59495860437985471, -15.62459632003994159 13.62358734786955949, -15.39877031092446025 13.86036876063091938, -15.08173539881381942 13.87649180750598532, -14.68703080896848689 13.63035696049978363, -14.37671383305578843 13.62568024337737427, -14.04699235681748171 13.79406789800044919, -13.84496334477240786 13.50504161219200228, -14.27770178878455454 13.280585…	Admin-0 country	1	6	Gambia	GMB	0	2	Sovereign country	Gambia	GMB	0	Gambia	GMB	0	Gambia	GMB	0	Gambia	The Gambia	GMB	Gambia		Gambia	GM	Republic of the Gambia		Gambia, The			Gambia, The		1	4	1	8	2051363	12	3387	2017	2003	2016	7. Least developed region	5. Low income	-99	GA	GM	GMB	GMB	270
MultiPolygon (((9.4821399268052744 30.30755605724618817, 9.0556026546681494 32.10269196220129118, 8.43910281742611801 32.50628489840082125, 8.43047285323336837 32.7483373072559516, 7.61264163578218245 33.34411489514896232, 7.52448164229224403 34.09737641045146006, 8.14098147953430384 34.6551459823937904, 8.37636762862376827 35.47987600355594395, 8.21782433435231496 36.43317698826028561, 8.4209643…	Admin-0 country	1	3	Tunisia	TUN	0	2	Sovereign country	Tunisia	TUN	0	Tunisia	TUN	0	Tunisia	TUN	0	Tunisia	Tunisia	TUN	Tunisia		Tun.	TN	Republic of Tunisia		Tunisia			Tunisia		4	3	3	2	11403800	14	130800	2017	2004	2016	6. Developing region	3. Upper middle income	-99	TS	TN	TUN	TUN	788
MultiPolygon (((-8.68439978680905256 27.39574412689600535, -8.66512447756419135 27.58947907155822676, -8.66558956545480896 27.65642588959235582, -8.67411617678297375 28.84128896739657932, -7.05922766766195764 29.57922842052460055, -6.06063229005377391 29.73169973400169397, -5.24212927898278735 30.00044302013559161, -4.85964616537447114 30.50118764904384605, -3.69044104655472438 30.896951605751155…	Admin-0 country	1	3	Algeria	DZA	0	2	Sovereign country	Algeria	DZA	0	Algeria	DZA	0	Algeria	DZA	0	Algeria	Algeria	DZA	Algeria		Alg.	DZ	People's Democratic Republic of Algeria		Algeria			Algeria		5	1	6	3	40969443	15	609400	2017	2008	2016	6. Developing region	3. Upper middle income	-99	AG	DZ	DZA	DZA	12
MultiPolygon (((35.54566531753454228 32.39399201103057635, 35.71991824722275055 32.70919240979486631, 36.8340621274355442 32.31293752698077526, 38.79234052913608366 33.37868642835222488, 39.1954683774449677 32.16100881604266704, 39.00488569515255222 32.01021698661497794, 37.00216556168101079 31.50841299084474656, 37.99884891129437392 30.50849986421313531, 37.66811974462638091 30.33866526948590092…	Admin-0 country	1	4	Jordan	JOR	0	2	Sovereign country	Jordan	JOR	0	Jordan	JOR	0	Jordan	JOR	0	Jordan	Jordan	JOR	Jordan		Jord.	J	Hashemite Kingdom of Jordan		Jordan			Jordan		5	3	4	4	10248069	14	86190	2017	2004	2016	6. Developing region	3. Upper middle income	-99	JO	JO	JOR	JOR	400
MultiPolygon (((51.57951867046327266 24.24549713795110506, 51.75744062684418623 24.29407298430546902, 51.7943892759328719 24.01982615813250632, 52.57708051942560701 24.17743927662270664, 53.40400678896014597 24.15131684009917024, 54.00800092958758114 24.12175792082821602, 54.69302371604862856 24.79789236093509075, 55.43902469261414012 25.43914520924494127, 56.07082075381455866 26.0554641789739811…	Admin-0 country	1	4	United Arab Emirates	ARE	0	2	Sovereign country	United Arab Emirates	ARE	0	United Arab Emirates	ARE	0	United Arab Emirates	ARE	0	United Arab Emirates	United Arab Emirates	ARE	United Arab Emirates		U.A.E.	AE	United Arab Emirates		United Arab Emirates			United Arab Emirates		2	1	3	3	6072475	13	667200	2017	2010	2016	6. Developing region	2. High income: nonOECD	-99	AE	AE	ARE	ARE	784
MultiPolygon (((50.81010827006957697 24.75474253997137808, 50.74391076030369163 25.48242422128939566, 51.01335167827349437 26.00699168548419493, 51.28646162293605926 26.11458201751586827, 51.58907881043725752 25.80111277923338164, 51.60670047384881087 25.2156704777987386, 51.38960778179063027 24.62738597258805839, 51.11241539897702069 24.55633087818672422, 50.81010827006957697 24.7547425399713780…	Admin-0 country	1	5	Qatar	QAT	0	2	Sovereign country	Qatar	QAT	0	Qatar	QAT	0	Qatar	QAT	0	Qatar	Qatar	QAT	Qatar		Qatar	QA	State of Qatar		Qatar			Qatar		3	6	2	4	2314307	12	334500	2017	2010	2016	6. Developing region	2. High income: nonOECD	-99	QA	QA	QAT	QAT	634
MultiPolygon (((47.97451907734989618 29.97581920014850354, 48.18318851094448974 29.53447663015976232, 48.09394331237641751 29.30629934337500231, 48.4160941912839462 28.55200429942667029, 47.70885053893738359 28.52606273041614315, 47.45982181172283276 29.0025194361472245, 46.56871341328175617 29.09902517345229001, 47.30262210469096118 30.05906993257072202, 47.97451907734989618 29.97581920014850354…	Admin-0 country	1	6	Kuwait	KWT	0	2	Sovereign country	Kuwait	KWT	0	Kuwait	KWT	0	Kuwait	KWT	0	Kuwait	Kuwait	KWT	Kuwait		Kwt.	KW	State of Kuwait		Kuwait			Kuwait		2	2	2	2	2875422	12	301100	2017	2010	2016	6. Developing region	2. High income: nonOECD	-99	KU	KW	KWT	KWT	414
MultiPolygon (((39.1954683774449677 32.16100881604266704, 38.79234052913608366 33.37868642835222488, 41.00615888851993418 34.41937226006211858, 41.38396528500581439 35.62831655531435615, 41.28970747250545514 36.35881460219226824, 41.83706424334096141 36.60585378676357493, 42.34959109881177142 37.22987254490409725, 42.77912560402182862 37.38526357680575529, 43.94225874204730076 37.2562275253729495…	Admin-0 country	1	3	Iraq	IRQ	0	2	Sovereign country	Iraq	IRQ	0	Iraq	IRQ	0	Iraq	IRQ	0	Iraq	Iraq	IRQ	Iraq		Iraq	IRQ	Republic of Iraq		Iraq			Iraq		1	4	3	1	39192111	15	596700	2017	1997	2016	6. Developing region	4. Lower middle income	-99	IZ	IQ	IRQ	IRQ	368
MultiPolygon (((55.20834109886319396 22.70832998299704641, 55.23448937360288369 23.1109927434153235, 55.5258410988644755 23.52486928964093238, 55.528631626208238 23.93360403085350185, 55.98121382022046078 24.13054291431782872, 55.804118686756226 24.26960419361526533, 55.88623253766800758 24.92083059335744721, 56.39684736514400498 24.92473216399548619, 56.84514041527600625 24.24167308196150472, 57…	Admin-0 country	1	4	Oman	OMN	0	2	Sovereign country	Oman	OMN	0	Oman	OMN	0	Oman	OMN	0	Oman	Oman	OMN	Oman		Oman	OM	Sultanate of Oman		Oman			Oman		1	4	1	6	3424386	12	173100	2017	2010	2016	6. Developing region	2. High income: nonOECD	-99	MU	OM	OMN	OMN	512
MultiPolygon (((167.21680138576959962 -15.89184620530842018, 167.84487674384502043 -16.46633310309717046, 167.51518110582287591 -16.59784962327999125, 167.18000776597779122 -16.15999521247094606, 167.21680138576959962 -15.89184620530842018)),((166.79315799384085039 -15.66881072353668714, 166.64985924709549181 -15.39270354580121136, 166.62913699774640008 -14.62649708420960515, 167.1077124372014850…	Admin-0 country	1	4	Vanuatu	VUT	0	2	Sovereign country	Vanuatu	VUT	0	Vanuatu	VUT	0	Vanuatu	VUT	0	Vanuatu	Vanuatu	VUT	Vanuatu		Van.	VU	Republic of Vanuatu		Vanuatu			Vanuatu		6	3	7	3	282814	10	723	2017	2009	2016	7. Least developed region	4. Lower middle income	-99	NH	VU	VUT	VUT	548
MultiPolygon (((102.58493248902669848 12.18659495691328232, 102.34809939983301774 13.39424734135822348, 102.98842207236162949 14.22572113693446738, 104.28141808473661456 14.4167430689013667, 105.21877689007888534 14.27321177821069398, 106.0439461609155245 13.88109100997995604, 106.49637332563088421 14.5705838078342822, 107.38272749230108616 14.20244090418697169, 107.61454796756243013 13.535530707…	Admin-0 country	1	3	Cambodia	KHM	0	2	Sovereign country	Cambodia	KHM	0	Cambodia	KHM	0	Cambodia	KHM	0	Cambodia	Cambodia	KHM	Cambodia		Camb.	KH	Kingdom of Cambodia		Cambodia			Cambodia		6	3	6	5	16204486	14	58940	2017	2008	2016	7. Least developed region	5. Low income	-99	CB	KH	KHM	KHM	116
MultiPolygon (((105.21877689007888534 14.27321177821069398, 104.28141808473661456 14.4167430689013667, 102.98842207236162949 14.22572113693446738, 102.34809939983301774 13.39424734135822348, 102.58493248902669848 12.18659495691328232, 101.68715783081995596 12.64574005782657196, 100.8318095235248677 12.62708486576920563, 100.97846723836920546 13.41272166590256631, 100.09779747925111337 13.40685639…	Admin-0 country	1	3	Thailand	THA	0	2	Sovereign country	Thailand	THA	0	Thailand	THA	0	Thailand	THA	0	Thailand	Thailand	THA	Thailand		Thai.	TH	Kingdom of Thailand		Thailand			Thailand		3	6	8	1	68414135	16	1161000	2017	2010	2016	5. Emerging region: G20	3. Upper middle income	-99	TH	TH	THA	THA	764
MultiPolygon (((107.38272749230108616 14.20244090418697169, 106.49637332563088421 14.5705838078342822, 106.0439461609155245 13.88109100997995604, 105.21877689007888534 14.27321177821069398, 105.54433841351769274 14.72393362066041789, 105.58903852745015683 15.57031606695285753, 104.77932050986879631 16.44186493577144859, 104.71694705609249354 17.42885895433008159, 103.95647667848530205 18.24095408…	Admin-0 country	1	4	Laos	LAO	0	2	Sovereign country	Laos	LAO	0	Laos	LAO	0	Laos	LAO	0	Laos	Lao PDR	LAO	Laos		Laos	LA	Lao People's Democratic Republic		Laos			Lao PDR		1	1	1	9	7126706	13	40960	2017	2005	2016	7. Least developed region	4. Lower middle income	-99	LA	LA	LAO	LAO	418
MultiPolygon (((100.11598758341784787 20.41784963630818694, 99.54330936075930936 20.1865976018020632, 98.95967573445487631 19.75298065844094708, 98.2537239929156101 19.70820302986004435, 97.79778283080440815 18.62708038988175474, 97.37589643757354452 18.44543773037581502, 97.85912275593486243 17.56794607184366441, 98.4937610209113501 16.8378355982079313, 98.90334842325675879 16.17782420497611895,…	Admin-0 country	1	3	Myanmar	MMR	0	2	Sovereign country	Myanmar	MMR	0	Myanmar	MMR	0	Myanmar	MMR	0	Myanmar	Myanmar	MMR	Myanmar		Myan.	MM	Republic of the Union of Myanmar		Burma			Myanmar		2	2	5	13	55123814	16	311100	2017	1983	2016	7. Least developed region	5. Low income	-99	BM	MM	MMR	MMR	104
MultiPolygon (((104.33433475140347468 10.48654368737522979, 105.19991499229234932 10.88930980065809706, 106.24967003786946407 10.96181183516358715, 105.81052371625312958 11.56761465092122876, 107.49140302941088976 12.33720591882794793, 107.61454796756243013 13.53553070724420593, 107.38272749230108616 14.20244090418697169, 107.56452518110390315 15.20217316330555946, 107.31270592654560403 15.908538…	Admin-0 country	1	2	Vietnam	VNM	0	2	Sovereign country	Vietnam	VNM	0	Vietnam	VNM	0	Vietnam	VNM	0	Vietnam	Vietnam	VNM	Vietnam		Viet.	VN	Socialist Republic of Vietnam		Vietnam			Vietnam		5	6	5	4	96160163	16	594900	2017	2009	2016	5. Emerging region: G20	4. Lower middle income	-99	VM	VN	VNM	VNM	704
MultiPolygon (((130.78000366004675925 42.2200078132032246, 130.78000485358512606 42.22001036108257921, 130.7800073589311296 42.22000722916884996, 130.78000366004675925 42.2200078132032246)),((130.6399997069095491 42.39502427522179318, 130.64000000000010004 42.39500000000003865, 130.77999231657832979 42.22000960427718752, 130.4000305522890244 42.2800035670597083, 129.96594852103726225 41.941367906…	Admin-0 country	1	3	North Korea	PRK	0	2	Sovereign country	North Korea	PRK	0	North Korea	PRK	0	North Korea	PRK	0	North Korea	Dem. Rep. Korea	PRK	Dem. Rep. Korea		N.K.	KP	Democratic People's Republic of Korea		Korea, North			Korea, Dem. Rep.		3	5	3	9	25248140	15	40000	2013	2009	2016	7. Least developed region	5. Low income	-99	KN	KP	PRK	PRK	408
MultiPolygon (((126.17475874237624112 37.74968577732803965, 126.23733890188175621 37.84037791600027845, 126.68371992401893067 37.8047728541511816, 127.07330854706737 38.2561148137884004, 127.78003543509100837 38.30453563084589064, 128.20574588431145457 38.37039724380188943, 128.34971642467661468 38.61224294692785008, 129.21291954968006621 37.43239248305594913, 129.46044966035816515 36.78418915460…	Admin-0 country	1	2	South Korea	KOR	0	2	Sovereign country	South Korea	KOR	0	South Korea	KOR	0	South Korea	KOR	0	South Korea	Republic of Korea	KOR	Republic of Korea		S.K.	KR	Republic of Korea		Korea, South			Korea, Rep.		4	1	1	5	51181299	16	1929000	2017	2010	2016	4. Emerging region: MIKT	1. High income: OECD	-99	KS	KR	KOR	KOR	410
MultiPolygon (((87.75126427607671076 49.29719798440548573, 88.80556684769551623 49.47052073831242325, 90.71366743364067986 50.3318118353210906, 92.23471154171967612 50.80217072204172268, 93.10421000000002323 50.49529000000001133, 94.14756635943558649 50.48053660745716797, 94.81594933469872899 50.01343333597085206, 95.81402000000019825 49.97746000000012145, 97.2597600000001421 49.72605000000004338…	Admin-0 country	1	3	Mongolia	MNG	0	2	Sovereign country	Mongolia	MNG	0	Mongolia	MNG	0	Mongolia	MNG	0	Mongolia	Mongolia	MNG	Mongolia		Mong.	MN	Mongolia		Mongolia			Mongolia		3	5	5	6	3068243	12	37000	2017	2010	2016	6. Developing region	4. Lower middle income	-99	MG	MN	MNG	MNG	496
MultiPolygon (((97.32711388549003573 28.26158274994633857, 97.40256147663613717 27.88253611908544372, 97.05198855996809471 27.69905894623315135, 97.13399905801530565 27.08377350514996351, 96.41936567585096896 27.26458934173922444, 95.12476769407496135 26.5735720891322984, 95.15515343626259437 26.00130727793208507, 94.60324913938538316 25.16249542897040214, 94.55265791217163951 24.6752383488903355…	Admin-0 country	1	2	India	IND	0	2	Sovereign country	India	IND	0	India	IND	0	India	IND	0	India	India	IND	India		India	IND	Republic of India		India			India		1	3	2	2	1281935911	18	8721000	2017	2011	2016	3. Emerging region: BRIC	4. Lower middle income	-99	IN	IN	IND	IND	356
MultiPolygon (((92.67272098182556306 22.04123891854125361, 92.6522571146379903 21.32404755297848453, 92.30323449093867794 21.47548533780981828, 92.36855350135562048 20.67088328702534739, 92.08288618364613853 21.19219513598577009, 92.02521528520838956 21.70156972908676707, 91.8348909850774362 22.1829356958855648, 91.4170870299976599 22.76501902922122156, 90.49600630082727548 22.8050165878151283, 9…	Admin-0 country	1	3	Bangladesh	BGD	0	2	Sovereign country	Bangladesh	BGD	0	Bangladesh	BGD	0	Bangladesh	BGD	0	Bangladesh	Bangladesh	BGD	Bangladesh		Bang.	BD	People's Republic of Bangladesh		Bangladesh			Bangladesh		3	4	7	7	157826578	17	628400	2017	2011	2016	7. Least developed region	5. Low income	-99	BG	BD	BGD	BGD	50
MultiPolygon (((91.69665652869667838 27.77174184825166492, 92.10371178585974405 27.45261404063320754, 92.03348351437509223 26.83831045176356156, 91.21751264848643359 26.80864817962802249, 90.37327477413407451 26.87572418874287905, 89.74452762243885218 26.71940298105995737, 88.83564253128938049 27.09896637624376226, 88.81424848832055829 27.29931590423936427, 89.47581017452111496 28.042758897406397…	Admin-0 country	1	5	Bhutan	BTN	0	2	Sovereign country	Bhutan	BTN	0	Bhutan	BTN	0	Bhutan	BTN	0	Bhutan	Bhutan	BTN	Bhutan		Bhutan	BT	Kingdom of Bhutan		Bhutan			Bhutan		5	6	1	8	758288	11	6432	2017	2005	2016	7. Least developed region	4. Lower middle income	-99	BT	BT	BTN	BTN	64
MultiPolygon (((88.12044070836986975 27.87654165293959352, 88.04313276566122681 27.44581858978682476, 88.17480431514091777 26.81040517832595071, 88.0602376647498204 26.41461538340249149, 87.2274719583662943 26.39789805755607688, 86.02439293817917587 26.63098460540857104, 85.25177859898337829 26.7261984319063437, 84.67501793817379507 27.2349012313875356, 83.30424889519954945 27.36450572357556155, …	Admin-0 country	1	3	Nepal	NPL	0	2	Sovereign country	Nepal	NPL	0	Nepal	NPL	0	Nepal	NPL	0	Nepal	Nepal	NPL	Nepal		Nepal	NP	Nepal		Nepal			Nepal		2	2	3	12	29384297	15	71520	2017	2001	2016	7. Least developed region	5. Low income	-99	NP	NP	NPL	NPL	524
MultiPolygon (((77.83745079947456702 35.49400950778776576, 76.87172163280402515 34.65354401299273945, 75.75706098826833568 34.50492259372131798, 74.24020267120496896 34.74888703057125383, 73.74994835805196658 34.31769887952785325, 74.10429365427734183 33.44147329358685283, 74.45155927927871176 32.76489960380550315, 75.25864179881321547 32.2711054550404981, 74.40592898956501244 31.6926394719652790…	Admin-0 country	1	2	Pakistan	PAK	0	2	Sovereign country	Pakistan	PAK	0	Pakistan	PAK	0	Pakistan	PAK	0	Pakistan	Pakistan	PAK	Pakistan		Pak.	PK	Islamic Republic of Pakistan		Pakistan			Pakistan		2	2	3	11	204924861	17	988200	2017	1998	2016	5. Emerging region: G20	4. Lower middle income	-99	PK	PK	PAK	PAK	586
MultiPolygon (((66.51860680528866965 37.36278432875879218, 67.0757820982596229 37.35614390720928668, 67.82999962755951628 37.14499400486468517, 68.13556237170138274 37.0231151393043092, 68.85944583524593554 37.34433584243059556, 69.19627282092437781 37.15114350030742685, 69.51878543485796058 37.60899669041342008, 70.11657840361033323 37.58822276463209278, 70.27057417184013843 37.73516469985402466…	Admin-0 country	1	3	Afghanistan	AFG	0	2	Sovereign country	Afghanistan	AFG	0	Afghanistan	AFG	0	Afghanistan	AFG	0	Afghanistan	Afghanistan	AFG	Afghanistan		Afg.	AF	Islamic State of Afghanistan		Afghanistan			Afghanistan		5	6	8	7	34124811	15	64080	2017	1979	2016	7. Least developed region	5. Low income	-99	AF	AF	AFG	AFG	4
MultiPolygon (((67.82999962755951628 37.14499400486468517, 68.39203250516595745 38.15702525486874208, 68.17602501818592486 38.90155345311390533, 67.44221967964131181 39.14014354100548587, 67.7014286640173566 39.58047842056453192, 68.53641645698942853 39.53345286717893714, 69.01163292834550589 40.08615814875666672, 69.32949466337282729 40.72782440852485308, 70.66662234892504557 40.9602133245414137…	Admin-0 country	1	4	Tajikistan	TJK	0	2	Sovereign country	Tajikistan	TJK	0	Tajikistan	TJK	0	Tajikistan	TJK	0	Tajikistan	Tajikistan	TJK	Tajikistan		Tjk.	TJ	Republic of Tajikistan		Tajikistan			Tajikistan		3	6	2	5	8468555	13	25810	2017	2010	2016	6. Developing region	5. Low income	-99	TI	TJ	TJK	TJK	762
MultiPolygon (((70.9623148944991442 42.26615428320549483, 71.1862805520521249 42.70429291439214126, 71.84463829945059388 42.84539541276510022, 73.48975752146236573 42.50089447689131816, 73.64530358266091525 43.09127187760986999, 74.21286583852256058 43.29833934180336996, 75.63696495962201993 42.87789988867668001, 76.0003536314984558 42.98802236589067149, 77.65839196158322011 42.96068553320826311,…	Admin-0 country	1	4	Kyrgyzstan	KGZ	0	2	Sovereign country	Kyrgyzstan	KGZ	0	Kyrgyzstan	KGZ	0	Kyrgyzstan	KGZ	0	Kyrgyzstan	Kyrgyzstan	KGZ	Kyrgyzstan		Kgz.	KG	Kyrgyz Republic		Kyrgyzstan			Kyrgyz Republic		5	7	7	6	5789122	13	21010	2017	2009	2016	6. Developing region	5. Low income	-99	KG	KG	KGZ	KGZ	417
MultiPolygon (((52.50245975119614883 41.78331553808637011, 52.94429324729165387 42.11603424739759305, 54.07941775901495163 42.32410940202083083, 54.7553454933926389 42.04397146256657436, 55.45525109235376959 41.2598591171858402, 55.96819135928291189 41.30864166926936321, 57.09639122907910291 41.3223100856105674, 56.93221520368780375 41.82602610937560428, 57.78652998233707905 42.17055288346551833,…	Admin-0 country	1	4	Turkmenistan	TKM	0	2	Sovereign country	Turkmenistan	TKM	0	Turkmenistan	TKM	0	Turkmenistan	TKM	0	Turkmenistan	Turkmenistan	TKM	Turkmenistan		Turkm.	TM	Turkmenistan		Turkmenistan			Turkmenistan		3	2	1	9	5351277	13	94720	2017	1995	2016	6. Developing region	3. Upper middle income	-99	TX	TM	TKM	TKM	795
MultiPolygon (((48.5679712257897549 29.92677826590352197, 48.0145683123760989 30.45245677339259771, 48.00469811380832397 30.98513743745724369, 47.68528608581227246 30.9848532170796318, 47.8492037290421024 31.70917593029867021, 47.33466149271190915 32.46915538179911209, 46.10936160663931815 33.01728729911900473, 45.41669070819904164 33.96779775647958388, 45.64845950702809318 34.74813772230301367, …	Admin-0 country	1	2	Iran	IRN	0	2	Sovereign country	Iran	IRN	0	Iran	IRN	0	Iran	IRN	0	Iran	Iran	IRN	Iran		Iran	IRN	Islamic Republic of Iran		Iran			Iran, Islamic Rep.		4	3	4	13	82021564	16	1459000	2017	2006	2016	5. Emerging region: G20	3. Upper middle income	-99	IR	IR	IRN	IRN	364
MultiPolygon (((35.71991824722275055 32.70919240979486631, 35.70079796727475241 32.71601369885738109, 35.836396925608625 32.8681232773085128, 35.82110070165023785 33.27742645927629894, 36.06646040217205496 33.82491242119255048, 36.61175011571589266 34.20178864189718126, 36.44819420751210259 34.59393524834406719, 35.99840254084364233 34.64491404880000402, 35.90502322769222587 35.41000946709732489,…	Admin-0 country	1	3	Syria	SYR	0	2	Sovereign country	Syria	SYR	0	Syria	SYR	0	Syria	SYR	0	Syria	Syria	SYR	Syria		Syria	SYR	Syrian Arab Republic		Syria			Syrian Arab Republic		2	6	2	6	18028549	14	50280	2017	2004	2015	6. Developing region	4. Lower middle income	-99	SY	SY	SYR	SYR	760
MultiPolygon (((46.50571984231797273 38.77060537368629412, 46.14362308124881906 38.74120148371221717, 45.73537926614301341 39.31971914321974282, 45.73997846861698235 39.47399913182712794, 45.2981449725214631 39.47175120702243589, 45.00198733905674686 39.7400035670495555, 44.79398969908194772 39.71300263117704787, 44.40000857928870204 40.00500031184228078, 43.65643639504094153 40.25356395116618557…	Admin-0 country	1	6	Armenia	ARM	0	2	Sovereign country	Armenia	ARM	0	Armenia	ARM	0	Armenia	ARM	0	Armenia	Armenia	ARM	Armenia		Arm.	ARM	Republic of Armenia		Armenia			Armenia		3	1	2	10	3045191	12	26300	2017	2001	2016	6. Developing region	4. Lower middle income	-99	AM	AM	ARM	ARM	51
MultiPolygon (((11.02736860519686779 58.85614940045935839, 11.46827192551114649 59.43239329694603867, 12.30036583827489949 60.11793284773003165, 12.63114668137518493 61.29357168237013553, 11.99206424322156295 61.80036245385655036, 11.9305692887942314 63.12831757267697697, 12.57993533697393396 64.06621898055833242, 13.5719161312487131 64.04911408146971041, 13.91990522630220362 64.44542064071607967…	Admin-0 country	1	3	Sweden	SWE	0	2	Sovereign country	Sweden	SWE	0	Sweden	SWE	0	Sweden	SWE	0	Sweden	Sweden	SWE	Sweden		Swe.	S	Kingdom of Sweden		Sweden			Sweden		1	4	2	4	9960487	13	498100	2017	-99	2016	2. Developed region: nonG7	1. High income: OECD	-99	SW	SE	SWE	SWE	752
MultiPolygon (((28.17670942557793978 56.16912995057879243, 29.22951338066030758 55.91834422466636312, 29.37157189303067284 55.67009064393618445, 29.89629438652235649 55.78946320253041335, 30.87390913262001035 55.55097646750341056, 30.9718359718131353 55.08154775656404212, 30.75753380709872076 54.8117709417843173, 31.3844722836637402 54.157056382862379, 31.79142418796223879 53.97463857687212396, 3…	Admin-0 country	1	4	Belarus	BLR	0	2	Sovereign country	Belarus	BLR	0	Belarus	BLR	0	Belarus	BLR	0	Belarus	Belarus	BLR	Belarus		Bela.	BY	Republic of Belarus		Belarus			Belarus		1	1	5	11	9549747	13	165400	2017	2009	2016	6. Developing region	3. Upper middle income	-99	BO	BY	BLR	BLR	112
MultiPolygon (((31.78599244755525177 52.10167756993970301, 32.15944000000013148 52.06125000000014325, 32.41205813978768902 52.28869497334977723, 32.71576053236708503 52.23846548116210897, 33.75269982273579217 52.33507457133180196, 34.3917305844570933 51.76888174092590589, 34.14197838719053379 51.56641347920634644, 34.22481570815426721 51.25599315042887838, 35.0221830584179088 51.20757233337150183…	Admin-0 country	1	3	Ukraine	UKR	0	2	Sovereign country	Ukraine	UKR	0	Ukraine	UKR	0	Ukraine	UKR	0	Ukraine	Ukraine	UKR	Ukraine		Ukr.	UA	Ukraine		Ukraine			Ukraine		5	1	6	3	44033874	15	352600	2017	2001	2016	6. Developing region	4. Lower middle income	-99	UP	UA	UKR	UKR	804
MultiPolygon (((23.48412763844984852 53.91249766704113711, 23.527535841575002 53.4701215684065545, 23.80493493011778128 53.08973135030607438, 23.79919884613337899 52.69109935160656732, 23.19949384938618664 52.4869774440536716, 23.50800215016869288 52.0236465521247311, 23.52707075368437017 51.57845408793031083, 24.0299857927489029 50.70540660257518084, 23.92275719574325876 50.42488108987873829, 23…	Admin-0 country	1	3	Poland	POL	0	2	Sovereign country	Poland	POL	0	Poland	POL	0	Poland	POL	0	Poland	Poland	POL	Poland		Pol.	PL	Republic of Poland		Poland			Poland		3	7	1	2	38476269	15	1052000	2017	2011	2016	2. Developed region: nonG7	1. High income: OECD	-99	PL	PL	POL	POL	616
MultiPolygon (((16.97966678230403659 48.12349701597630514, 16.90375410326726069 47.71486562762832762, 16.34058434415041461 47.71290192320122969, 16.53426761238037557 47.49617096616911738, 16.20229821133736436 46.85238597267696292, 16.01166385261265646 46.68361074481170192, 15.1370919125049852 46.65870270444703038, 14.63247155117482912 46.43181732846954901, 13.80647545742152715 46.5093061386912154…	Admin-0 country	1	4	Austria	AUT	0	2	Sovereign country	Austria	AUT	0	Austria	AUT	0	Austria	AUT	0	Austria	Austria	AUT	Austria		Aust.	A	Republic of Austria		Austria			Austria		3	1	3	4	8754413	13	416600	2017	2011	2016	2. Developed region: nonG7	1. High income: OECD	-99	AU	AT	AUT	AUT	40
MultiPolygon (((22.08560835133485512 48.42226430927178882, 22.64081993987872465 48.15023956968741459, 22.71053144704049487 47.88219391538940783, 22.09976769378283734 47.67243927671670178, 21.62651492685387211 46.99423777931816204, 21.02195234547124869 46.31608795835190051, 20.22019249846283628 46.12746898048655453, 19.5960445492415829 46.17172984474454012, 18.8298380876499607 45.90887767189192914…	Admin-0 country	1	5	Hungary	HUN	0	2	Sovereign country	Hungary	HUN	0	Hungary	HUN	0	Hungary	HUN	0	Hungary	Hungary	HUN	Hungary		Hun.	HU	Republic of Hungary		Hungary			Hungary		4	6	1	5	9850845	13	267600	2017	2001	2016	2. Developed region: nonG7	1. High income: OECD	-99	HU	HU	HUN	HUN	348
MultiPolygon (((26.61933678559779537 48.22072622333347169, 26.85782352062480527 48.36821076109449535, 27.5225374691951572 48.46711945250111597, 28.25954674654184373 48.15556224221342063, 28.67089114758516644 48.11814850523410314, 29.12269819511303126 47.84909516050646516, 29.05086795422727164 47.51022695575250054, 29.41513512545273556 47.34664520933257847, 29.55967410657311234 46.9285828720913258…	Admin-0 country	1	6	Moldova	MDA	0	2	Sovereign country	Moldova	MDA	0	Moldova	MDA	0	Moldova	MDA	0	Moldova	Moldova	MDA	Moldova		Mda.	MD	Republic of Moldova		Moldova			Moldova		3	5	4	12	3474121	12	18540	2017	2004	2016	6. Developing region	4. Lower middle income	-99	MD	MD	MDA	MDA	498
MultiPolygon (((28.23355350109903839 45.48828318946829086, 28.67977949393938175 45.30403087013170449, 29.14972496920165312 45.46492544207245601, 29.60328901542743552 45.29330801043112587, 29.62654340995877078 45.0353909368623988, 29.14161176933183484 44.82021027279904501, 28.83785770032019968 44.91387380632805559, 28.55808149589199729 43.70746165625813262, 27.97010704927507518 43.8124681666752167…	Admin-0 country	1	3	Romania	ROU	0	2	Sovereign country	Romania	ROU	0	Romania	ROU	0	Romania	ROU	0	Romania	Romania	ROU	Romania		Rom.	RO	Romania		Romania			Romania		1	4	3	13	21529967	15	441000	2017	2011	2016	2. Developed region: nonG7	3. Upper middle income	-99	RO	RO	ROU	ROU	642
MultiPolygon (((26.49433149588375613 55.61510691997763445, 26.58827924979038926 55.16717560487167304, 25.76843265147979878 54.84696259217508896, 25.53635379405699268 54.28242340760252915, 24.45068362803703721 53.90570221619475433, 23.48412763844984852 53.91249766704113711, 23.24398725758950945 54.22056671814914353, 22.73109866709265248 54.32753693299332554, 22.65105187347253946 54.582740993866735…	Admin-0 country	1	5	Lithuania	LTU	0	2	Sovereign country	Lithuania	LTU	0	Lithuania	LTU	0	Lithuania	LTU	0	Lithuania	Lithuania	LTU	Lithuania		Lith.	LT	Republic of Lithuania		Lithuania			Lithuania		6	3	3	9	2823859	12	85620	2017	2011	2016	2. Developed region: nonG7	3. Upper middle income	-99	LH	LT	LTU	LTU	440
MultiPolygon (((27.28818484875151285 57.4745283067038315, 27.77001590344093174 57.24425812441123185, 27.85528201672252635 56.75932648378429235, 28.17670942557793978 56.16912995057879243, 27.10245975109452843 55.78331370708768588, 26.49433149588375613 55.61510691997763445, 25.53304650239033435 56.10029694276603607, 25.00093427908089438 56.1645307481048377, 24.86068444184076043 56.37252838807962974…	Admin-0 country	1	5	Latvia	LVA	0	2	Sovereign country	Latvia	LVA	0	Latvia	LVA	0	Latvia	LVA	0	Latvia	Latvia	LVA	Latvia		Lat.	LV	Republic of Latvia		Latvia			Latvia		4	7	6	13	1944643	12	50650	2017	2011	2016	2. Developed region: nonG7	3. Upper middle income	-99	LG	LV	LVA	LVA	428
MultiPolygon (((27.98112685700098723 59.47537333432526907, 27.98112000000003263 59.47537000000011176, 28.13169925305174957 59.30082510033092547, 27.42015000000014879 58.72457000000014204, 27.71668582531572156 57.79189911562436066, 27.28818484875151285 57.4745283067038315, 26.46353234223778728 57.47638865826633037, 25.60280968598436857 57.84752879498657308, 25.1645935401492693 57.9701569688151892,…	Admin-0 country	1	6	Estonia	EST	0	2	Sovereign country	Estonia	EST	0	Estonia	EST	0	Estonia	EST	0	Estonia	Estonia	EST	Estonia		Est.	EST	Republic of Estonia		Estonia			Estonia		3	2	1	10	1251581	12	38700	2017	2000	2016	2. Developed region: nonG7	1. High income: OECD	-99	EN	EE	EST	EST	233
MultiPolygon (((14.11968631354255876 53.75702912049104043, 14.3533154639341376 53.24817129171297125, 14.07452111171943443 52.9812625189253481, 14.43759972500220101 52.62485016540838956, 14.68502648281568668 52.08994741475520129, 14.60709842291953464 51.74518809671997133, 15.01699588385866946 51.10667409932158023, 14.57071821458606564 51.00233938252427635, 14.30701338060063676 51.11726776794141358…	Admin-0 country	1	2	Germany	DEU	0	2	Sovereign country	Germany	DEU	0	Germany	DEU	0	Germany	DEU	0	Germany	Germany	DEU	Germany		Ger.	D	Federal Republic of Germany		Germany			Germany		2	5	5	1	80594017	16	3979000	2017	2011	2016	1. Developed region: G7	1. High income: OECD	-99	GM	DE	DEU	DEU	276
MultiPolygon (((22.65714969248298871 44.2349230006612828, 22.9448323910518468 43.82378530534712979, 23.33230228037632514 43.89701080990471382, 24.10067915212417233 43.74105133724785333, 25.56927168142692608 43.68844472917471933, 26.0651587256997459 43.94349376075126656, 27.24239952974090784 44.17598602963240495, 27.97010704927507518 43.81246816667521671, 28.55808149589199729 43.70746165625813262,…	Admin-0 country	1	4	Bulgaria	BGR	0	2	Sovereign country	Bulgaria	BGR	0	Bulgaria	BGR	0	Bulgaria	BGR	0	Bulgaria	Bulgaria	BGR	Bulgaria		Bulg.	BG	Republic of Bulgaria		Bulgaria			Bulgaria		4	5	1	8	7101510	13	143100	2017	2011	2016	2. Developed region: nonG7	3. Upper middle income	-99	BU	BG	BGR	BGR	100
MultiPolygon (((26.29000288260169782 35.29999034274793246, 26.16499759288765858 35.00499542900976735, 24.72498213064230299 34.91998769788963841, 24.73500735850691612 35.08499054619758795, 23.51497846852808138 35.27999156345097731, 23.69998009613300383 35.70500438083549, 24.24666507334870502 35.36802236586018466, 25.02501549652890844 35.4249956324619717, 25.76920779796418515 35.35401805270907971, …	Admin-0 country	1	3	Greece	GRC	0	2	Sovereign country	Greece	GRC	0	Greece	GRC	0	Greece	GRC	0	Greece	Greece	GRC	Greece		Greece	GR	Hellenic Republic		Greece			Greece		2	2	2	9	10768477	14	290500	2017	2011	2016	2. Developed region: nonG7	1. High income: OECD	-99	GR	GR	GRC	GRC	300
MultiPolygon (((44.77267710159504333 37.17043692561684054, 44.29345177590286653 37.0015143906063031, 43.94225874204730076 37.25622752537294957, 42.77912560402182862 37.38526357680575529, 42.34959109881177142 37.22987254490409725, 41.21208947120305055 37.07435232192169394, 40.67325931169568776 37.09127635349729246, 39.52258019385254784 36.71605377862599084, 38.69989139176590243 36.7129273544723417…	Admin-0 country	1	2	Turkey	TUR	0	2	Sovereign country	Turkey	TUR	0	Turkey	TUR	0	Turkey	TUR	0	Turkey	Turkey	TUR	Turkey		Tur.	TR	Republic of Turkey		Turkey			Turkey		6	3	8	4	80845215	16	1670000	2017	2000	2016	4. Emerging region: MIKT	3. Upper middle income	-99	TU	TR	TUR	TUR	792
MultiPolygon (((21.02004031747640056 40.84272695572587963, 20.99998986174722404 40.5800039739539784, 20.67499677906363331 40.43499990494302665, 20.61500044117275365 40.11000682225937908, 20.15001590341051951 39.62499766698397252, 19.98000044117014795 39.69499339452340791, 19.96000166187320701 39.91500580500604656, 19.40608198413673335 40.2507734238224657, 19.31905887215714301 40.72723012955356126…	Admin-0 country	1	6	Albania	ALB	0	2	Sovereign country	Albania	ALB	0	Albania	ALB	0	Albania	ALB	0	Albania	Albania	ALB	Albania		Alb.	AL	Republic of Albania		Albania			Albania		1	4	1	6	3047987	12	33900	2017	2001	2016	6. Developing region	4. Lower middle income	-99	AL	AL	ALB	ALB	8
MultiPolygon (((16.56480838386485743 46.50375092221982953, 16.88251508959530156 46.38063182228444248, 17.63006635912955744 45.95176911069418679, 18.45606245288286118 45.75948110613614972, 18.82982479287394639 45.90887235802528465, 19.07276899585417596 45.52151113543209249, 19.39047570158459166 45.23651561134238364, 19.00548459755759367 44.86023449354298975, 18.55321414559165305 45.081589667331456…	Admin-0 country	1	6	Croatia	HRV	0	2	Sovereign country	Croatia	HRV	0	Croatia	HRV	0	Croatia	HRV	0	Croatia	Croatia	HRV	Croatia		Cro.	HR	Republic of Croatia		Croatia			Croatia		5	4	5	1	4292095	12	94240	2017	2011	2016	2. Developed region: nonG7	2. High income: nonOECD	-99	HR	HR	HRV	HRV	191
MultiPolygon (((9.5942261084463496 47.52505809182027008, 9.6329317562329777 47.34760122332998833, 9.47996951664902099 47.10280996356337369, 9.93244835779665891 46.92072805438296257, 10.44270145024663066 46.89354625099743146, 10.36337812667861158 46.483571275409858, 9.92283654139038163 46.31489940040918896, 9.18288170740305532 46.44021474871698274, 8.96630577966780606 46.036931871111193, 8.4899524…	Admin-0 country	1	4	Switzerland	CHE	0	2	Sovereign country	Switzerland	CHE	0	Switzerland	CHE	0	Switzerland	CHE	0	Switzerland	Switzerland	CHE	Switzerland		Switz.	CH	Swiss Confederation		Switzerland			Switzerland		5	2	7	3	8236303	13	496300	2017	2010	2016	2. Developed region: nonG7	1. High income: OECD	-99	SZ	CH	CHE	CHE	756
MultiPolygon (((6.0430733577811111 50.12805166279423474, 6.24275109215699331 49.90222565367872676, 6.18632042809417726 49.46380280211451463, 5.89775923017634796 49.44266714130711193, 5.67405195478482938 49.52948354755750415, 5.78241743330090685 50.09032786722121955, 6.0430733577811111 50.12805166279423474)))	Admin-0 country	1	6	Luxembourg	LUX	0	2	Sovereign country	Luxembourg	LUX	0	Luxembourg	LUX	0	Luxembourg	LUX	0	Luxembourg	Luxembourg	LUX	Luxembourg		Lux.	L	Grand Duchy of Luxembourg		Luxembourg			Luxembourg		1	7	3	7	594130	11	58740	2017	2011	2016	2. Developed region: nonG7	1. High income: OECD	-99	LU	LU	LUX	LUX	442
MultiPolygon (((6.1566581559587803 50.80372101501058069, 6.0430733577811111 50.12805166279423474, 5.78241743330090685 50.09032786722121955, 5.67405195478482938 49.52948354755750415, 4.79922163251572442 49.98537303323637104, 4.28602298342508448 49.90749664977255406, 3.58818444175565787 50.37899241800356265, 3.12325158042568773 50.78036326761454688, 2.65842207196027402 50.79684804951574506, 2.51357…	Admin-0 country	1	2	Belgium	BEL	0	2	Sovereign country	Belgium	BEL	0	Belgium	BEL	0	Belgium	BEL	0	Belgium	Belgium	BEL	Belgium		Belg.	B	Kingdom of Belgium		Belgium			Belgium		3	2	1	8	11491346	14	508600	2017	2011	2016	2. Developed region: nonG7	1. High income: OECD	-99	BE	BE	BEL	BEL	56
MultiPolygon (((6.90513960127412929 53.4821621771306468, 7.09205325687389632 53.14404328064489391, 6.84286950036238295 52.22844025329754913, 6.58939659997082572 51.85202912048339385, 5.9886580745778133 51.85161570902505446, 6.1566581559587803 50.80372101501058069, 5.60697594567000124 51.03729848896978183, 4.97399132652691378 51.47502370869813149, 4.04707116050752802 51.26725861266857009, 3.314971…	Admin-0 country	1	5	Netherlands	NL1	1	2	Country	Netherlands	NLD	0	Netherlands	NLD	0	Netherlands	NLD	0	Netherlands	Netherlands	NLD	Netherlands		Neth.	NL	Kingdom of the Netherlands		Netherlands			Netherlands		4	2	2	9	17084719	14	870800	2017	2011	2016	2. Developed region: nonG7	1. High income: OECD	-99	NL	NL	NLD	NLD	528
MultiPolygon (((-9.03481767418024617 41.88057058365967578, -8.67194576662672034 42.13468943945495937, -8.26385698081779196 42.28046865495034012, -8.01317460776991197 41.79088613541712505, -7.42251298667379533 41.7920746933598366, -7.25130896649082413 41.91834605566504734, -6.66860551596765649 41.88338694921958449, -6.38908769370091534 41.38181549739465481, -6.85112667482255233 41.1110826686175272…	Admin-0 country	1	2	Portugal	PRT	0	2	Sovereign country	Portugal	PRT	0	Portugal	PRT	1	Portugal	PR1	0	Portugal	Portugal	PR1	Portugal		Port.	P	Portuguese Republic		Portugal			Portugal		1	7	1	4	10839514	14	297100	2017	2011	2016	2. Developed region: nonG7	1. High income: OECD	-99	PO	PT	PRT	PRT	620
MultiPolygon (((-7.45372555177809204 37.0977875839660669, -7.53710547528102381 37.42890432387623889, -7.16650794109986489 37.8038943548022246, -7.02928117514879602 38.07576406508977129, -7.37409216961631842 38.37305858006492087, -7.09803666831312796 39.03007274022378681, -7.49863237143972583 39.62957103124180946, -7.06659155926352867 39.71189158788277496, -7.02641313315659488 40.1845242376242453,…	Admin-0 country	1	2	Spain	ESP	0	2	Sovereign country	Spain	ESP	0	Spain	ESP	0	Spain	ESP	0	Spain	Spain	ESP	Spain		Sp.	E	Kingdom of Spain		Spain			Spain		4	5	5	5	48958159	15	1690000	2017	2001	2016	2. Developed region: nonG7	1. High income: OECD	-99	SP	ES	ESP	ESP	724
MultiPolygon (((-6.19788489422099076 53.86756500916336421, -6.03298539877761097 53.15316417094435053, -6.78885657391084862 52.26011790629233644, -8.56161658368355916 51.66930125589935585, -9.97708574059026887 51.82045482035307771, -9.16628251793078164 52.86462881124268165, -9.68852454267245378 53.88136261658529946, -8.32798743329200875 54.66451894796863087, -7.57216793459106441 55.131622219454868…	Admin-0 country	1	3	Ireland	IRL	0	2	Sovereign country	Ireland	IRL	0	Ireland	IRL	0	Ireland	IRL	0	Ireland	Ireland	IRL	Ireland		Ire.	IRL	Ireland		Ireland			Ireland		2	3	2	2	5011102	13	322000	2017	2011	2016	2. Developed region: nonG7	1. High income: OECD	-99	EI	IE	IRL	IRL	372
MultiPolygon (((165.77998986232637435 -21.08000497811562823, 166.5999914899338421 -21.70001881275352673, 167.12001142808691156 -22.15999073658349161, 166.74003462144480636 -22.39997608814694985, 166.18973229396866031 -22.1297083472604541, 165.47437544175221547 -21.67960662199823219, 164.82981530177568175 -21.14981983814195132, 164.16799523341364875 -20.44474659595162791, 164.02960574773601365 -20…	Admin-0 country	1	3	France	FR1	1	2	Dependency	New Caledonia	NCL	0	New Caledonia	NCL	0	New Caledonia	NCL	0	New Caledonia	New Caledonia	NCL	New Caledonia		New C.	NC	New Caledonia	Nouvelle-Calédonie	New Caledonia	Fr.		New Caledonia		7	5	9	11	279070	10	10770	2017	2009	2016	6. Developing region	2. High income: nonOECD	-99	NC	NC	NCL	NCL	540
MultiPolygon (((162.11902469304089891 -10.48271900802114942, 162.39864586817219561 -10.82636728276210647, 161.70003218001835421 -10.82001108159021108, 161.31979699121475846 -10.20475147872316768, 161.91738325423801825 -10.44670053471371318, 162.11902469304089891 -10.48271900802114942)),((161.67998172428912085 -9.59998219161136745, 161.52939660059058724 -9.78431202559648483, 160.78825320866053517 …	Admin-0 country	1	3	Solomon Islands	SLB	0	2	Sovereign country	Solomon Islands	SLB	0	Solomon Islands	SLB	0	Solomon Islands	SLB	0	Solomon Is.	Solomon Islands	SLB	Solomon Is.		S. Is.	SB			Solomon Islands			Solomon Islands		1	4	1	6	647581	11	1198	2017	2009	2016	7. Least developed region	4. Lower middle income	-99	BP	SB	SLB	SLB	90
MultiPolygon (((176.88582360260519977 -40.06597787858220272, 176.50801720611926271 -40.60480803808957262, 176.01244022044022586 -41.28962411882147165, 175.23956749908296615 -41.68830779395327824, 175.06789839100935069 -41.42589487077513155, 174.65097293527847455 -41.28182097754540081, 175.22763024322355818 -40.45923552832336156, 174.90015669178990265 -39.90893320084720131, 173.82404666574393559 -…	Admin-0 country	1	2	New Zealand	NZ1	1	2	Country	New Zealand	NZL	0	New Zealand	NZL	0	New Zealand	NZL	0	New Zealand	New Zealand	NZL	New Zealand		N.Z.	NZ	New Zealand		New Zealand			New Zealand		3	3	4	4	4510327	12	174800	2017	2006	2016	2. Developed region: nonG7	1. High income: OECD	-99	NZ	NZ	NZL	NZL	554
MultiPolygon (((147.6892594748841816 -40.80825815202267393, 148.28906782449598722 -40.87543751400210823, 148.35986453673586993 -42.06244516374643894, 148.01730146707302538 -42.40702361426865252, 147.91405195535384109 -43.21152231218853501, 147.56456424376392533 -42.9376888974739046, 146.87034305235488318 -43.63459726336210309, 146.66332726459364721 -43.58085377377855707, 146.04837772032033172 -43…	Admin-0 country	1	2	Australia	AU1	1	2	Country	Australia	AUS	0	Australia	AUS	0	Australia	AUS	0	Australia	Australia	AUS	Australia		Auz.	AU	Commonwealth of Australia		Australia			Australia		1	2	2	7	23232413	15	1189000	2017	2006	2016	2. Developed region: nonG7	1. High income: OECD	-99	AS	AU	AUS	AUS	36
MultiPolygon (((81.78795901889139941 7.52305532473316418, 81.63732221876058759 6.48177521405192181, 81.21801964714433097 6.19714142498828835, 80.34835696810441164 5.96836985923215479, 79.87246870312853275 6.7634634464749297, 79.69516686393512828 8.20084341067338585, 80.14780073437964347 9.82407766360955748, 80.8388179869865553 9.26842682539118812, 81.30431928907177053 8.56420624433368971, 81.7879…	Admin-0 country	1	3	Sri Lanka	LKA	0	2	Sovereign country	Sri Lanka	LKA	0	Sri Lanka	LKA	0	Sri Lanka	LKA	0	Sri Lanka	Sri Lanka	LKA	Sri Lanka		Sri L.	LK	Democratic Socialist Republic of Sri Lanka		Sri Lanka			Sri Lanka		3	5	4	9	22409381	15	236700	2017	2001	2016	6. Developing region	4. Lower middle income	-99	CE	LK	LKA	LKA	144
MultiPolygon (((109.47520958866364538 18.19770091396857481, 108.65520796105616341 18.50768199307138673, 108.62621748254044007 19.36788788500190606, 109.11905561730803527 19.8210385197693455, 110.2115987488228086 20.1012539738720335, 110.7865507345022138 20.0775344914500522, 111.01005130416457689 19.69592987719072141, 110.57064660038676607 19.25587921800926949, 110.33918786015146907 18.67839508714…	Admin-0 country	1	2	China	CH1	1	2	Country	China	CHN	0	China	CHN	0	China	CHN	0	China	China	CHN	China		China	CN	People's Republic of China		China			China		4	4	4	3	1379302771	18	21140000	2017	2010	2016	3. Emerging region: BRIC	3. Upper middle income	-99	CH	CN	CHN	CHN	156
MultiPolygon (((121.77781782438992764 24.39427358651940025, 121.17563235889274154 22.79085724536716739, 120.74707970589622619 21.97057139738211262, 120.22008344938367941 22.81486094816673926, 120.10618859261239777 23.5562627222582357, 120.69467980355224768 24.53845083261373716, 121.49504438688877883 25.29545888925738595, 121.95124393116145711 24.99759593352703746, 121.77781782438992764 24.3942735…	Admin-0 country	1	3	Taiwan	TWN	0	2	Sovereign country	Taiwan	TWN	0	Taiwan	TWN	0	Taiwan	TWN	1	Taiwan	Taiwan	B77	Taiwan		Taiwan	TW			Taiwan		Self admin.; Claimed by China	Taiwan		1	5	7	2	23508428	15	1127000	2017	-99	2016	2. Developed region: nonG7	2. High income: nonOECD	-99	TW	TW	TWN	TWN	158
MultiPolygon (((10.44270145024663066 46.89354625099743146, 11.04855594243653627 46.75135854754633868, 11.16482791509326944 46.94157949481272851, 12.15308800624305441 47.11539317482645117, 12.37648522304081666 46.76755910906985036, 13.80647545742152715 46.50930613869121544, 13.6981099789054781 46.01677806251735348, 13.93763024257830807 45.59101593686462195, 13.14160647955429617 45.7366917994954178…	Admin-0 country	1	2	Italy	ITA	0	2	Sovereign country	Italy	ITA	0	Italy	ITA	0	Italy	ITA	0	Italy	Italy	ITA	Italy		Italy	I	Italian Republic		Italy			Italy		6	7	8	7	62137802	16	2221000	2017	2012	2016	1. Developed region: G7	1. High income: OECD	-99	IT	IT	ITA	ITA	380
MultiPolygon (((9.92190636560911798 54.983104153048032, 9.28204878097113806 54.83086538351617634, 8.52622928227020793 54.96274363872515778, 8.12031090661753296 55.51772268332359772, 8.0899768408622208 56.54001170513758723, 8.25658165857120707 56.80996938743032842, 8.54343753422341479 57.11000275331694809, 9.42446902836755385 57.17206614849950341, 9.77555870935853477 57.44794078228966328, 10.58000…	Admin-0 country	1	4	Denmark	DN1	1	2	Country	Denmark	DNK	0	Denmark	DNK	0	Denmark	DNK	0	Denmark	Denmark	DNK	Denmark		Den.	DK	Kingdom of Denmark		Denmark			Denmark		4	1	3	12	5605948	13	264800	2017	2011	2016	2. Developed region: nonG7	1. High income: OECD	-99	DA	DK	DNK	DNK	208
MultiPolygon (((-6.19788489422099076 53.86756500916336421, -6.9537302311380671 54.07370229757563607, -7.57216793459106441 54.05995636658600034, -7.36603064617878545 54.59584096945272336, -7.57216793459106441 55.13162221945486863, -6.7338470117361453 55.1728600124237829, -5.66194861492196821 54.55460317648380908, -6.19788489422099076 53.86756500916336421)),((-3.09383067378871601 53.404547400669684…	Admin-0 country	1	2	United Kingdom	GB1	1	2	Country	United Kingdom	GBR	0	United Kingdom	GBR	0	United Kingdom	GBR	0	United Kingdom	United Kingdom	GBR	United Kingdom		U.K.	GB	United Kingdom of Great Britain and Northern Ireland		United Kingdom			United Kingdom		6	6	6	3	64769452	16	2788000	2017	2011	2016	1. Developed region: G7	1. High income: OECD	-99	UK	GB	GBR	GBR	826
MultiPolygon (((-14.50869544112923393 66.45589223903142795, -14.73963741704160668 65.80874827744030142, -13.60973222497981006 65.12667104761986536, -14.90983374679490225 64.36408193628868446, -17.79443803554342196 63.67874909123385407, -18.65624589687499224 63.49638296167582041, -19.97275468594276049 63.64363495549152816, -22.76297197111015791 63.96017894149538563, -21.77848425951768263 64.402115…	Admin-0 country	1	3	Iceland	ISL	0	2	Sovereign country	Iceland	ISL	0	Iceland	ISL	0	Iceland	ISL	0	Iceland	Iceland	ISL	Iceland		Iceland	IS	Republic of Iceland		Iceland			Iceland		1	4	4	9	339747	10	16150	2017	-99	2016	2. Developed region: nonG7	1. High income: OECD	-99	IC	IS	ISL	ISL	352
MultiPolygon (((46.40495079934882483 41.86067515722730548, 46.68607059101660894 41.8271371526698772, 47.37331546406623062 41.21973236751119885, 47.81566572448463148 41.15141612402135252, 47.98728315612598294 41.40581920019423023, 48.5843533961134213 41.80886879162066805, 49.11026370626069593 41.28228668880051089, 49.61891482930960251 40.57292430272995887, 50.08482954285312871 40.526157131505812, …	Admin-0 country	1	5	Azerbaijan	AZE	0	2	Sovereign country	Azerbaijan	AZE	0	Azerbaijan	AZE	0	Azerbaijan	AZE	0	Azerbaijan	Azerbaijan	AZE	Azerbaijan		Aze.	AZ	Republic of Azerbaijan		Azerbaijan			Azerbaijan		1	6	5	8	9961396	13	167900	2017	2009	2016	6. Developing region	3. Upper middle income	-99	AJ	AZ	AZE	AZE	31
MultiPolygon (((39.95500857927092397 43.43499766699922304, 40.076964959479767 43.55310415300231597, 40.9221900000001142 43.38215000000013788, 42.39440000000013242 43.22030000000006567, 43.75599000000011074 42.7408300000000736, 43.9312100000001351 42.55496000000010781, 44.53762291848198629 42.71199270280362725, 45.47027916848571749 42.50278066666997745, 45.77640000000002374 42.09244000000018104, 4…	Admin-0 country	1	5	Georgia	GEO	0	2	Sovereign country	Georgia	GEO	0	Georgia	GEO	0	Georgia	GEO	0	Georgia	Georgia	GEO	Georgia		Geo.	GE	Georgia		Georgia			Georgia		5	1	3	2	4926330	12	37270	2017	2002	2016	6. Developing region	4. Lower middle income	-99	GG	GE	GEO	GEO	268
MultiPolygon (((120.83389611214656156 12.70449616134243342, 120.32343631396744854 13.46641347905382524, 121.18012820850211142 13.42969737391044305, 121.52739383350349556 13.0695901554845193, 121.26219038298158637 12.20556020756440319, 120.83389611214656156 12.70449616134243342)),((122.58608890186710028 9.98104482669613446, 122.83708133350874903 10.26115692793422518, 122.947410516451896 10.8818683…	Admin-0 country	1	2	Philippines	PHL	0	2	Sovereign country	Philippines	PHL	0	Philippines	PHL	0	Philippines	PHL	0	Philippines	Philippines	PHL	Philippines		Phil.	PH	Republic of the Philippines		Philippines			Philippines		3	2	2	8	104256076	17	801900	2017	2010	2016	5. Emerging region: G20	4. Lower middle income	-99	RP	PH	PHL	PHL	608
MultiPolygon (((100.08575687052710634 6.46448944745029053, 100.25959638875696101 6.64282481528954349, 101.07551557821335564 6.20486705161592145, 101.15421878459386562 5.69138418214771491, 101.81428185425798461 5.81080841717424246, 102.14118696493638083 6.22163605389462759, 102.37114708863521173 6.12820506431091871, 102.9617053568667302 5.52449514406110609, 103.38121463421217072 4.8550011255037475…	Admin-0 country	1	3	Malaysia	MYS	0	2	Sovereign country	Malaysia	MYS	0	Malaysia	MYS	0	Malaysia	MYS	0	Malaysia	Malaysia	MYS	Malaysia		Malay.	MY	Malaysia		Malaysia			Malaysia		2	4	3	6	31381992	15	863000	2017	2010	2016	6. Developing region	3. Upper middle income	-99	MY	MY	MYS	MYS	458
MultiPolygon (((115.45071048386981261 5.44772980389153361, 115.40570031134360818 4.95522756593383917, 115.34746097215065674 4.31663605388700944, 114.86955732631540172 4.34831370688192465, 114.65959598191352597 4.00763682699775359, 114.204016554828371 4.52587392823680545, 114.59996137904872171 4.90001129802996616, 115.45071048386981261 5.44772980389153361)))	Admin-0 country	1	6	Brunei	BRN	0	2	Sovereign country	Brunei	BRN	0	Brunei	BRN	0	Brunei	BRN	0	Brunei	Brunei Darussalam	BRN	Brunei		Brunei	BN	Negara Brunei Darussalam		Brunei			Brunei		4	6	6	12	443593	10	33730	2017	2001	2016	6. Developing region	2. High income: nonOECD	-99	BX	BN	BRN	BRN	96
MultiPolygon (((13.80647545742152715 46.50930613869121544, 14.63247155117482912 46.43181732846954901, 15.1370919125049852 46.65870270444703038, 16.01166385261265646 46.68361074481170192, 16.20229821133736436 46.85238597267696292, 16.3705049984474158 46.84132721616650485, 16.56480838386485743 46.50375092221982953, 15.76873294440855311 46.23810822202344895, 15.67152957526755586 45.83415355079787901…	Admin-0 country	1	6	Slovenia	SVN	0	2	Sovereign country	Slovenia	SVN	0	Slovenia	SVN	0	Slovenia	SVN	0	Slovenia	Slovenia	SVN	Slovenia		Slo.	SLO	Republic of Slovenia		Slovenia			Slovenia		2	3	2	12	1972126	12	68350	2017	2011	2016	2. Developed region: nonG7	1. High income: OECD	-99	SI	SI	SVN	SVN	705
MultiPolygon (((28.59192955904319433 69.06477692328665796, 28.44594363781865809 68.36461294216404383, 29.97742638522061043 67.69829702419275463, 29.05458865735232621 66.94428620062205937, 30.21765000000000256 65.80598000000000525, 29.5444295590469892 64.94867157659048473, 30.44468468600371125 64.20445343693909024, 30.03587243014271735 63.5528136257385512, 31.51609215671112452 62.86768748641289051…	Admin-0 country	1	3	Finland	FI1	1	2	Country	Finland	FIN	0	Finland	FIN	0	Finland	FIN	0	Finland	Finland	FIN	Finland		Fin.	FIN	Republic of Finland		Finland			Finland		4	1	4	6	5491218	13	224137	2017	2010	2016	2. Developed region: nonG7	1. High income: OECD	-99	FI	FI	FIN	FIN	246
MultiPolygon (((22.55813764821175482 49.08573802346714388, 22.28084191253356039 48.82539215758067286, 22.08560835133485512 48.42226430927178882, 21.87223636240173619 48.31997081155002149, 20.80129397958492632 48.62385407164238416, 20.47356204598986551 48.56285004332181643, 20.23905439624934743 48.32756724709692264, 19.76947065601311238 48.20269114846361447, 19.66136355965849702 48.266614895208661…	Admin-0 country	1	6	Slovakia	SVK	0	2	Sovereign country	Slovakia	SVK	0	Slovakia	SVK	0	Slovakia	SVK	0	Slovakia	Slovakia	SVK	Slovakia		Svk.	SK	Slovak Republic		Slovakia			Slovak Republic		2	4	4	9	5445829	13	168800	2017	2011	2016	2. Developed region: nonG7	1. High income: OECD	-99	LO	SK	SVK	SVK	703
MultiPolygon (((15.01699588385866946 51.10667409932158023, 15.49097212083972863 50.78472992614320702, 16.23862674323856936 50.69773265237984106, 16.17625328946226659 50.42260732685790714, 16.71947594571443574 50.21574656839354134, 16.86876915860565873 50.47397370055603005, 17.55456709155112094 50.36214590107641698, 17.64944502123898928 50.049038397819956, 18.39291385262217204 49.98862864847075116…	Admin-0 country	1	5	Czechia	CZE	0	2	Sovereign country	Czechia	CZE	0	Czechia	CZE	0	Czechia	CZE	0	Czechia	Czech Republic	CZE	Czechia		Cz.	CZ	Czech Republic	la République tchèque	Czechia			Czechia	Česko	1	1	2	6	10674723	14	350900	2017	2011	2016	2. Developed region: nonG7	1. High income: OECD	-99	EZ	CZ	CZE	CZE	203
MultiPolygon (((36.42951000000005024 14.42211000000003196, 36.32321999999999207 14.82249000000001615, 36.75389000000006945 16.29186000000004242, 36.85253000000011525 16.95654999999999291, 37.16747000000009393 17.26314000000013493, 37.90400000000011005 17.42754000000002179, 38.41008995947322546 17.99830739997031515, 38.99062299984001356 16.8406261255516938, 39.26611006038802998 15.9227234969672508…	Admin-0 country	1	4	Eritrea	ERI	0	2	Sovereign country	Eritrea	ERI	0	Eritrea	ERI	0	Eritrea	ERI	0	Eritrea	Eritrea	ERI	Eritrea		Erit.	ER	State of Eritrea		Eritrea			Eritrea		3	1	2	12	5918919	13	9169	2017	1984	2016	7. Least developed region	5. Low income	-99	ER	ER	ERI	ERI	232
MultiPolygon (((141.88460086483496525 39.1808645696514759, 140.95948937394581435 38.17400096287661881, 140.97638756730526666 37.1420742864401916, 140.59976972876211221 36.3439834661244987, 140.77407433488258448 35.84287710219021506, 140.25327925024510023 35.13811391859364619, 138.97552778539619567 34.66760000257613683, 137.21759891169125467 34.60628591566182877, 135.79298302626892792 33.464805202…	Admin-0 country	1	2	Japan	JPN	0	2	Sovereign country	Japan	JPN	0	Japan	JPN	0	Japan	JPN	0	Japan	Japan	JPN	Japan		Japan	J	Japan		Japan			Japan		5	3	5	4	126451398	17	4932000	2017	2010	2016	1. Developed region: G7	1. High income: OECD	-99	JA	JP	JPN	JPN	392
MultiPolygon (((-58.1663923814080448 -20.176700941653678, -57.87067399761779996 -20.73268767668195167, -57.93715572776129363 -22.09017587655717207, -56.88150956890289933 -22.28215382252147947, -56.47331743022939321 -22.08630014413528286, -55.7979581366069084 -22.35692962004782203, -55.61068274598114414 -22.65561939869484576, -55.51763932963963555 -23.5719975725266373, -55.40074723979542171 -23.95…	Admin-0 country	1	4	Paraguay	PRY	0	2	Sovereign country	Paraguay	PRY	0	Paraguay	PRY	0	Paraguay	PRY	0	Paraguay	Paraguay	PRY	Paraguay		Para.	PY	Republic of Paraguay		Paraguay			Paraguay		6	3	6	2	6943739	13	64670	2017	2002	2016	5. Emerging region: G20	4. Lower middle income	-99	PA	PY	PRY	PRY	600
MultiPolygon (((52.00000980002224082 19.00000336351605768, 52.78218427919205169 17.34974233649123221, 53.10857262554750946 16.65105113368895218, 52.38520592632588091 16.3824112004196536, 52.19172936382508965 15.93843313238402004, 52.16816491069999984 15.59742035568994822, 51.17251508973248519 15.17524974208149224, 49.57457645040314986 14.70876658778274759, 48.67923058451415841 14.0032024194856603…	Admin-0 country	1	3	Yemen	YEM	0	2	Sovereign country	Yemen	YEM	0	Yemen	YEM	0	Yemen	YEM	0	Yemen	Yemen	YEM	Yemen		Yem.	YE	Republic of Yemen		Yemen			Yemen, Rep.		5	3	3	11	28036829	15	73450	2017	2004	2016	7. Least developed region	4. Lower middle income	-99	YM	YE	YEM	YEM	887
MultiPolygon (((34.95603722508425903 29.3565546737788452, 36.06894087092206291 29.19749461518445344, 36.5012142270435902 29.50525360769870531, 36.74052778498725047 29.86528331147619042, 37.50358198420903477 30.00377615001840681, 37.66811974462638091 30.33866526948590092, 37.99884891129437392 30.50849986421313531, 37.00216556168101079 31.50841299084474656, 39.00488569515255222 32.01021698661497794…	Admin-0 country	1	2	Saudi Arabia	SAU	0	2	Sovereign country	Saudi Arabia	SAU	0	Saudi Arabia	SAU	0	Saudi Arabia	SAU	0	Saudi Arabia	Saudi Arabia	SAU	Saudi Arabia		Saud.	SA	Kingdom of Saudi Arabia		Saudi Arabia			Saudi Arabia		6	1	6	7	28571770	15	1731000	2017	2010	2016	2. Developed region: nonG7	2. High income: nonOECD	-99	SA	SA	SAU	SAU	682
MultiPolygon (((-48.6606160141825228 -78.04701873159872605, -48.15139645037839955 -78.04706960058676657, -46.66285681821098308 -77.83147552506505917, -45.15475765642108996 -78.04706960058676657, -43.92082780615574222 -78.47810272233327566, -43.4899497137061104 -79.08555999136849834, -43.37243750667438746 -79.51664478954731408, -43.33326677099714175 -80.02612273551289945, -44.88053666846426637 -80…	Admin-0 country	1	4	Antarctica	ATA	0	2	Indeterminate	Antarctica	ATA	0	Antarctica	ATA	0	Antarctica	ATA	0	Antarctica	Antarctica	ATA	Antarctica		Ant.	AQ					Multiple claims held in abeyance	Antarctica		4	5	1	-99	4050	4	810	2013	-99	2013	6. Developing region	2. High income: nonOECD	-99	AY	AQ	ATA	ATA	10
MultiPolygon (((32.73178022637745244 35.14002594658843748, 32.8024735857527503 35.14550364841137764, 32.94696089044080622 35.3867033961336972, 33.66722700372494614 35.37321584730551649, 34.57647382990046481 35.67159556735879278, 33.90080447768420413 35.24575592705761551, 33.97361657078346298 35.05850637464800457, 33.86643965021011127 35.09359467217419137, 33.67539188002706396 35.01786286065045317…	Admin-0 country	1	6	Northern Cyprus	CYN	0	2	Sovereign country	Northern Cyprus	CYN	0	Northern Cyprus	CYN	0	Northern Cyprus	CYN	1	N. Cyprus	Northern Cyprus	B20	N. Cyprus		N. Cy.	CN	Turkish Republic of Northern Cyprus			Self admin.	Self admin.; Claimed by Cyprus	Cyprus, Northern		3	1	4	8	265100	10	3600	2013	-99	2013	6. Developing region	3. Upper middle income	-99	-99	-99	-99	-99	-99
MultiPolygon (((32.73178022637745244 35.14002594658843748, 32.91957238132613384 35.08783274997364288, 33.19097700372304871 35.17312470147138015, 33.38383344903630245 35.16271190036457028, 33.45592207208346736 35.10142365166640843, 33.47581749851585187 35.00034455010350598, 33.52568525567750157 35.0386884628640729, 33.67539188002706396 35.01786286065045317, 33.86643965021011127 35.0935946721741913…	Admin-0 country	1	5	Cyprus	CYP	0	2	Sovereign country	Cyprus	CYP	0	Cyprus	CYP	0	Cyprus	CYP	0	Cyprus	Cyprus	CYP	Cyprus		Cyp.	CY	Republic of Cyprus		Cyprus			Cyprus		1	2	3	7	1221549	12	29260	2017	2001	2016	6. Developing region	2. High income: nonOECD	-99	CY	CY	CYP	CYP	196
MultiPolygon (((-2.16991370279862394 35.16839630791668014, -1.79298580566171495 34.52791860609130481, -1.73345455566146711 33.9197128362321223, -1.38804928222259605 32.86401500094137873, -1.12455115396630845 32.65152151135713154, -1.30789913573786998 32.26288890230610207, -2.61660478352956716 32.0943462183861925, -3.06898027181264821 31.72449799247321778, -3.64749793132014588 31.63729401298067501…	Admin-0 country	1	3	Morocco	MAR	0	2	Sovereign country	Morocco	MAR	0	Morocco	MAR	0	Morocco	MAR	0	Morocco	Morocco	MAR	Morocco		Mor.	MA	Kingdom of Morocco		Morocco			Morocco		2	2	3	9	33986655	15	282800	2017	2004	2016	6. Developing region	4. Lower middle income	-99	MO	MA	MAR	MAR	504
MultiPolygon (((36.86622999999997319 22, 32.89999999999997726 22, 29.01999999999998181 22, 25 22, 25 25.68249999636099901, 25 29.23865452953345923, 24.70007000000000019 30.04419000000000395, 24.95762000000000214 30.66159999999999997, 24.80286999999998443 31.08929000000000542, 25.16481999999999886 31.56915000000000049, 26.49532999999999916 31.58567999999999998, 27.45762000000000214 31.321259999999…	Admin-0 country	1	2	Egypt	EGY	0	2	Sovereign country	Egypt	EGY	0	Egypt	EGY	0	Egypt	EGY	0	Egypt	Egypt	EGY	Egypt		Egypt	EG	Arab Republic of Egypt		Egypt			Egypt, Arab Rep.		4	6	7	2	97041072	16	1105000	2017	2006	2016	5. Emerging region: G20	4. Lower middle income	-99	EG	EG	EGY	EGY	818
MultiPolygon (((25 22, 25.00000000000011369 20.00304000000005544, 23.85000000000013642 20.00000000000005684, 23.83766000000014174 19.58047000000010485, 19.84926000000007207 21.49509000000006154, 15.86085000000008449 23.40971999999999298, 14.85130000000003747 22.86295000000012578, 14.14387088385524294 22.49128896737113337, 13.58142459479046238 23.04050608976928061, 11.99950564947161347 23.47166840…	Admin-0 country	1	3	Libya	LBY	0	2	Sovereign country	Libya	LBY	0	Libya	LBY	0	Libya	LBY	0	Libya	Libya	LBY	Libya		Libya	LY	Libya		Libya			Libya		1	2	2	11	6653210	13	90890	2017	2006	2016	6. Developing region	3. Upper middle income	-99	LY	LY	LBY	LBY	434
MultiPolygon (((47.78941999999999979 8.00300000000000011, 44.96360000000000667 5.00161999999999995, 43.66086999999998852 4.95755000000008295, 42.76966999999999786 4.25258999999999965, 42.12860999999999478 4.23413000000000039, 41.85508309264397298 3.91891192048372705, 41.17179999999999751 3.91908999999999974, 40.76847999999999672 4.25702000000000069, 39.85493999999999915 3.83878999999999992, 39.55…	Admin-0 country	1	2	Ethiopia	ETH	0	2	Sovereign country	Ethiopia	ETH	0	Ethiopia	ETH	0	Ethiopia	ETH	0	Ethiopia	Ethiopia	ETH	Ethiopia		Eth.	ET	Federal Democratic Republic of Ethiopia		Ethiopia			Ethiopia		4	4	1	13	105350020	17	174700	2017	2007	2016	7. Least developed region	5. Low income	-99	ET	ET	ETH	ETH	231
MultiPolygon (((42.35156000000012 12.54223000000013144, 42.77964236834475287 12.45541575769567544, 43.08122602720015948 12.69963857670711604, 43.31785241066467051 12.39014842371102532, 43.28638146339892501 11.97492829024588445, 42.71587365089652621 11.73564057051834197, 43.14530480324214068 11.46203969974885695, 42.77685184100096194 10.92687856693441972, 42.55493000000012671 11.10511000000019521,…	Admin-0 country	1	5	Djibouti	DJI	0	2	Sovereign country	Djibouti	DJI	0	Djibouti	DJI	0	Djibouti	DJI	0	Djibouti	Djibouti	DJI	Djibouti		Dji.	DJ	Republic of Djibouti		Djibouti			Djibouti		1	2	4	8	865267	11	3345	2017	2009	2016	7. Least developed region	4. Lower middle income	-99	DJ	DJ	DJI	DJI	262
MultiPolygon (((48.94820475850985275 11.41061728169797007, 48.94820475850973907 11.41061728169796297, 48.94200524271835206 11.39426605879813792, 48.93849124532249562 10.98232737878346654, 48.93823286316103349 9.97350006758151153, 48.93812951029644864 9.45174896894661742, 48.48673587422695164 8.83762624758999493, 47.78941999999999979 8.00300000000000011, 46.948340000000087 7.99688000000008969, 43.…	Admin-0 country	1	5	Somaliland	SOL	0	2	Indeterminate	Somaliland	SOL	0	Somaliland	SOL	0	Somaliland	SOL	1	Somaliland	Somaliland	B30	Somaliland		Solnd.	SL	Republic of Somaliland			Self admin.	Self admin.; Claimed by Somalia	Somaliland		3	6	5	2	3500000	12	12250	2013	-99	2013	6. Developing region	4. Lower middle income	-99	-99	-99	-99	-99	-99
MultiPolygon (((33.90371119710452774 -0.95000000000000007, 31.86617000000006783 -1.02735999999993055, 30.7698600000001079 -1.01454999999998563, 30.4191048520192453 -1.13465911215041615, 29.82151858899601393 -1.44332244222978545, 29.57946618014088358 -1.34131316488562646, 29.5878377621721711 -0.58740569417938104, 29.8195032081366378 -0.2053101538133717, 29.87577884290243446 0.59737986897636119, 30…	Admin-0 country	1	3	Uganda	UGA	0	2	Sovereign country	Uganda	UGA	0	Uganda	UGA	0	Uganda	UGA	0	Uganda	Uganda	UGA	Uganda		Uga.	UG	Republic of Uganda		Uganda			Uganda		6	3	6	4	39570125	15	84930	2017	2002	2016	7. Least developed region	5. Low income	-99	UG	UG	UGA	UGA	800
MultiPolygon (((30.4191048520192453 -1.13465911215041615, 30.81613488131771206 -1.69891407634538871, 30.75830895358311068 -2.28725025798836867, 30.4696700000000078 -2.41382999999996173, 30.4696736457612225 -2.41385475710134001, 29.9383590024079389 -2.3484868302542381, 29.63217614107858822 -2.91785776124609697, 29.02492638521678714 -2.83925790773015763, 29.11747887545155322 -2.29221119548838459, 2…	Admin-0 country	1	3	Rwanda	RWA	0	2	Sovereign country	Rwanda	RWA	0	Rwanda	RWA	0	Rwanda	RWA	0	Rwanda	Rwanda	RWA	Rwanda		Rwa.	RW	Republic of Rwanda		Rwanda			Rwanda		5	2	3	10	11901484	14	21970	2017	2002	2016	7. Least developed region	5. Low income	-99	RW	RW	RWA	RWA	646
MultiPolygon (((18.55999999999994543 42.64999999999997726, 17.67492150235898407 43.02856252702360962, 17.29737348803445229 43.44634064388736761, 16.9161564470173289 43.66772247982567023, 16.45644290534886522 44.04123973243127921, 16.23966027188453154 44.35114329688570933, 15.75002607591898141 44.8187116562625647, 15.95936730313337648 45.23377676043094198, 16.31815677253587182 45.00412669532590826…	Admin-0 country	1	5	Bosnia and Herzegovina	BIH	0	2	Sovereign country	Bosnia and Herzegovina	BIH	0	Bosnia and Herzegovina	BIH	0	Bosnia and Herzegovina	BIH	0	Bosnia and Herz.	Bosnia and Herzegovina	BIH	Bosnia and Herz.		B.H.	BiH	Bosnia and Herzegovina		Bosnia and Herzegovina			Bosnia and Herzegovina		1	1	1	2	3856181	12	42530	2017	1991	2016	6. Developing region	3. Upper middle income	-99	BK	BA	BIH	BIH	70
MultiPolygon (((22.38052575042459225 42.32025950781508783, 22.88137373219734627 41.99929718685035596, 22.95237715016645197 41.33799388281114773, 22.76177000000001271 41.30480000000005703, 22.59730838388901475 41.13048716894320478, 22.05537763844426991 41.14986583105269347, 21.67416059742697598 40.93127452245795439, 21.02004031747640056 40.84272695572587963, 20.60518191903736351 41.086226304685226…	Admin-0 country	1	6	Macedonia	MKD	0	2	Sovereign country	Macedonia	MKD	0	Macedonia	MKD	0	Macedonia	MKD	0	Macedonia	Macedonia	MKD	Macedonia		Mkd.	MK	Former Yugoslav Republic of Macedonia		Macedonia			Macedonia, FYR		5	3	7	3	2103721	12	29520	2017	2010	2016	6. Developing region	3. Upper middle income	-99	MK	MK	MKD	MKD	807
MultiPolygon (((18.82982479287394639 45.90887235802528465, 18.8298380876499607 45.90887767189192914, 19.5960445492415829 46.17172984474454012, 20.22019249846283628 46.12746898048655453, 20.76217492033998724 45.73457306577148529, 20.87431277841335486 45.41637543393423471, 21.48352623870221123 45.18117015235787903, 21.56202273935360836 44.76894725196549985, 22.14508792490281053 44.47842234962058683…	Admin-0 country	1	5	Republic of Serbia	SRB	0	2	Sovereign country	Republic of Serbia	SRB	0	Republic of Serbia	SRB	0	Republic of Serbia	SRB	0	Serbia	Serbia	SRB	Serbia		Serb.	RS	Republic of Serbia		Serbia			Serbia		3	3	2	10	7111024	13	101800	2017	2011	2016	6. Developing region	3. Upper middle income	-99	RI	RS	SRB	SRB	688
MultiPolygon (((20.07070000000004484 42.58863000000008014, 19.80161339689868782 42.50009349219084243, 19.73805138517963087 42.6882473821655708, 19.30448611825079297 42.19574514420781952, 19.3717681633472516 41.87755067978349643, 19.1624599999999532 41.95502000000004728, 18.88214000000004944 42.28151000000002568, 18.45001688302086151 42.47999224531218232, 18.55999999999994543 42.64999999999997726,…	Admin-0 country	1	6	Montenegro	MNE	0	2	Sovereign country	Montenegro	MNE	0	Montenegro	MNE	0	Montenegro	MNE	0	Montenegro	Montenegro	MNE	Montenegro		Mont.	ME	Montenegro		Montenegro			Montenegro		4	1	4	5	642550	11	10610	2017	2011	2016	6. Developing region	3. Upper middle income	-99	MJ	ME	MNE	MNE	499
MultiPolygon (((20.59024654668022691 41.85540891928362583, 20.52295000000003711 42.21787000000006174, 20.28375451018189324 42.32025950781508072, 20.07070000000004484 42.58863000000008014, 20.25758000000007542 42.81275000000010778, 20.49679000000003271 42.88469000000003462, 20.63507999999995945 43.21670999999997775, 20.8144800000000032 43.2720500000000925, 20.95650999999998021 43.13094000000006645…	Admin-0 country	1	6	Kosovo	KOS	0	2	Sovereign country	Kosovo	KOS	0	Kosovo	KOS	0	Kosovo	KOS	0	Kosovo	Kosovo	KOS	Kosovo		Kos.	KO	Republic of Kosovo		Kosovo			Kosovo		2	2	3	11	1895250	12	18490	2017	1981	2016	6. Developing region	4. Lower middle income	-99	KV	XK	-99	-99	-99
MultiPolygon (((-61.68000000000000682 10.76000000000000156, -61.10500000000000398 10.89000000000000057, -60.89500000000000313 10.85500000000000043, -60.93500000000000227 10.10999999999999943, -61.77000000000001023 10, -61.95000000000000284 10.08999999999999986, -61.66000000000000369 10.36500000000000199, -61.68000000000000682 10.76000000000000156)))	Admin-0 country	1	5	Trinidad and Tobago	TTO	0	2	Sovereign country	Trinidad and Tobago	TTO	0	Trinidad and Tobago	TTO	0	Trinidad and Tobago	TTO	0	Trinidad and Tobago	Trinidad and Tobago	TTO	Trinidad and Tobago		Tr.T.	TT	Republic of Trinidad and Tobago		Trinidad and Tobago			Trinidad and Tobago		5	6	2	5	1218208	12	43570	2017	2011	2016	6. Developing region	2. High income: nonOECD	-99	TD	TT	TTO	TTO	780
MultiPolygon (((30.83385242171542728 3.50917160422246255, 29.95350019706947364 4.17369904216768361, 29.71599531425601981 4.60080475506015318, 29.15907840344650026 4.38926727947323059, 28.69667768729880208 4.45507721599693696, 28.42899376802691336 4.28715464926449386, 27.97997724784281104 4.40841339763737494, 27.37422610851749027 5.23394440350006107, 27.21340905122517029 5.55095347739455747, 26.46…	Admin-0 country	1	3	South Sudan	SDS	0	2	Sovereign country	South Sudan	SDS	0	South Sudan	SDS	0	South Sudan	SDS	0	S. Sudan	South Sudan	SDS	S. Sudan		S. Sud.	SS	Republic of South Sudan		South Sudan			South Sudan		1	3	3	5	13026129	14	20880	2017	2008	2016	7. Least developed region	5. Low income	-99	-99	SS	SSD	SSD	728
[truncated: 49 more columns]

## Sheet: Sheet2
Country	PLHIVreceivingART	PregnantwomenwhoreceivedARV	HIVprv100	HIVprevalence
Afghanistan	924	3	10	0.1
Algeria	12759	324	10	0.1
Angola	88734	9633	200	2
Antigua and Barbuda	366		110	1.1
Argentina	85455	1759	40	0.4
Armenia	1871	45.6	20	0.2
Azerbaijan	4397
Bangladesh	3045	36	10	0.1
Barbados	1527	16	150	1.5
Belarus	15524	234	50	0.5
Benin	44234	4607	100	1
Bolivia	9895	350	30	0.3
Botswana	307377	12359	2030	20.3
Brazil	592815		50	0.5
Bulgaria	1453		10	0.1
Burkina Faso	59328	4741	70	0.7
Burundi	65483	3986	100	1
Cabo Verde	2153		60	0.6
Cambodia	59526	619	50	0.5
Cameroon	281083	21716	360	3.6
Central African Republic	39641	3186	360	3.6
Chad	61352	5619	130	1.3
Chile	45103	366	50	0.5
China	718499
Colombia	113051	493	40	0.4
Comoros	96	4	10	0.1
Costa Rica	7246	35	40	0.4
Croatia	1177		10	0.1
Cuba	21946	184	40	0.4
Ivory Coast	252127	16499	260	2.6
Republic of the Congo	256486	11376	80	0.8
Djibouti	2680	61	120	1.2
Dominica	89	4	60	0.6
Dominican Republic	38952	765	90	0.9
Ecuador	25148	368	40	0.4
El Salvador	11862	108	60	0.6
Equatorial Guinea	21368	1277	710	7.1
Eritrea	8907	230	70	0.7
Eswatini	177156	8624	2730	27.3
Ethiopia	449962	18446	100	1
Gabon	35634	1904	380	3.8
Gambia	7541	695	190	1.9
Georgia	4597		40	0.4
Ghana	113171	12950	170	1.7
Grenada	289	8	50	0.5
Guatemala	20216	273	40	0.4
Guinea	48574	3324	140	1.4
Guinea-Bissau	14568	1001	350	3.5
Haiti	91514	4909	200	2
Honduras	11667	202	30	0.3
India	1211223	13195
Indonesia	108479	1818	40	0.4
Iran	12364	309	10	0.1
Jamaica	12594	398
Jordan	313		10	0.1
Kazakhstan	14951	360	20	0.2
Kenya	1067636	57523	470	4.7
Kiribati	10	1
Kuwait	395	4	10	0.1
Kyrgyzstan	3710	133	20	0.2
Laos	6484	92	30	0.3
Latvia	2401		40	0.4
Lebanon	1504		10	0.1
Lesotho	206298	8219	2360	23.6
Libya	13880	1827	130	1.3
Madagascar	3510	279	30	0.3
Malawi	814275	47148	920	9.2
Malaysia	41486	257	40	0.4
Mali	47055	2382	140	1.4
Mauritania	3032	51	20	0.2
Mexico	164518		20	0.2
Mongolia	195		10	0.1
Morocco	13641	216	10	0.1
Mozambique	1212562	109464	1260	12.6
Myanmar	166969	4303	80	0.8
Namibia	184245	12115	1180	11.8
Nepal	16914	146	10	0.1
Niger	19793	941	30	0.3
Nigeria	1016346	43667	150	1.5
Oman	1321	35	20	0.2
Pakistan	15838	322	10	0.1
Panama	14171	186	90	0.9
Papua New Guinea	29420	959	80	0.8
Paraguay	8549	246	50	0.5
Peru	57779	934	30	0.3
Philippines	33593	67	10	0.1
Portugal	37192		50	0.5
Republic of Moldova	5961	183	60	0.6
Romania	12088	232	10	0.1
Rwanda	193726	8552	250	2.5
Saint Kitts and Nevis	82	1	50	0.5
Saint Lucia	317		60	0.6
Saint Vincent and the Grenadines	384		150	1.5
Samoa	13
Sao Tome and Principe	820		70	0.7
Senegal	26606	1401	40	0.4
Seychelles	554	15
Sierra Leone	28415	4358	150	1.5
Singapore	6206	18	20	0.2
Solomon Islands	13
Somaliland	3262	88	10	0.1
South Africa	4788139	247690	2040	20.4
Spain	124831		30	0.3
Sri Lanka	1574	16	10	0.1
Sudan	8969	100	20	0.2
Suriname	2890	85	140	1.4
Switzerland	14800
Syria	130	9	10	0.1
Tajikistan	5995	219	20	0.2
Thailand	358606	3787	110	1.1
Macedonia	236		10	0.1
Togo	64839	4331	230	2.3
Ukraine	123516	2229	100	1
Uzbekistan	26733	539	20	0.2
Venezuela		406
Vietnam	149949	1932	30	0.3
Yemen	2249	26	10	0.1
Zambia	964689	56543	1130	11.3
Zimbabwe	1150543	59621	1270	12.7
